1 **Suboptimal dietary patterns are associated with accelerated biological aging in young**  
2 **adulthood: a twin study**

3

4 **Authors**

5 Suvi Ravi<sup>1,\*</sup>, Anna Kankaanpää<sup>1</sup>, Leonie H. Bogl<sup>2,3</sup>, Aino Heikkinen<sup>2</sup>, Kirsi H. Pietiläinen<sup>4,5</sup>,  
6 Jaakko Kaprio<sup>2</sup>, Miina Ollikainen<sup>2,6</sup>, Elina Sillanpää<sup>1,7</sup>

7

8 <sup>1</sup> Faculty of Sport and Health Sciences, Gerontology Research Center, University of Jyväskylä,  
9 40014 Jyväskylä, Finland, [suvi.m.ravi@jyu.fi](mailto:suvi.m.ravi@jyu.fi) (S.R.); [anna.k.kankaanpaa@jyu.fi](mailto:anna.k.kankaanpaa@jyu.fi) (A.K.);  
10 [elina.sillanpaa@jyu.fi](mailto:elina.sillanpaa@jyu.fi) (E.S.)

11 <sup>2</sup> Institute for Molecular Medicine Finland (FIMM), University of Helsinki, 00014 Helsinki,  
12 Finland, [leonie-helen.bogl@helsinki.fi](mailto:leonie-helen.bogl@helsinki.fi) (L.H.B.); [aino.heikkinen@helsinki.fi](mailto:aino.heikkinen@helsinki.fi) (A.H.);  
13 [jaakko.kaprio@helsinki.fi](mailto:jaakko.kaprio@helsinki.fi) (J.K.); [miina.ollikainen@helsinki.fi](mailto:miina.ollikainen@helsinki.fi) (M.O.)

14 <sup>3</sup> School of Health Professions, Bern University of Applied Sciences, 3012 Bern, Switzerland

15 <sup>4</sup> Obesity Research Unit, Research Program for Clinical and Molecular Metabolism, Faculty of  
16 Medicine, University of Helsinki, 00014 Helsinki, Finland, [kirsi.pietilainen@helsinki.fi](mailto:kirsi.pietilainen@helsinki.fi)

17 <sup>5</sup> Healthy Weight Hub, Endocrinology, Abdominal Center, Helsinki University Hospital, University  
18 of Helsinki, 00014 Helsinki, Finland

19 <sup>6</sup> Minerva Foundation Institute for Medical Research, 00290 Helsinki, Finland,

20 <sup>7</sup> The Wellbeing Services County of Central Finland, 40620 Jyväskylä, Finland

21 \* Corresponding author

## 22 ABSTRACT

23 **Background & aims** Suboptimal diets increase morbidity and mortality risk. Epigenetic clocks are  
24 algorithms that can assess health and lifespan, even at a young age, before clinical manifestations of  
25 diseases. We investigated the association between dietary patterns and biological aging in young  
26 adult twins.

27 **Methods** The data were drawn from the population-based FinnTwin12 study and consisted of twins  
28 aged 21–25 years (n=826). Food and beverage intakes were assessed using a food frequency  
29 questionnaire. Biological aging was estimated using the epigenetic clocks GrimAge and  
30 DunedinPACE. Latent class analysis was used to identify dietary patterns. The association between  
31 dietary patterns and biological aging was assessed using linear regression modeling at the individual  
32 level, followed by within–twin pair analyses to account for genetic liabilities and shared familial  
33 confounders.

34 **Results** Six dietary patterns were identified: 1) High fast food, low fruits and vegetables (F&V), 2)  
35 Plant-based, 3) Health-conscious, 4) Western with infrequent fish, 5) Western with regular fish, and  
36 6) Balanced average. At the individual level, GrimAge acceleration was slower in the Plant-based,  
37 Health-conscious, and Balanced-average patterns compared to the High fast food, low F&V, and  
38 faster in the Western with infrequent fish pattern compared to the Balanced average, regardless of  
39 sex, nonalcoholic energy intake, smoking, and alcohol consumption. After further adjustment for  
40 BMI and sports participation, the strengths of the associations modestly decreased; however, the  
41 difference between the Balanced-average and High fast food, low F&V patterns remained  
42 significant. The pace of aging (DunedinPACE) was slower in the Plant-based pattern compared to  
43 the High fast food, low F&V and the Western with infrequent fish patterns after adjustment for sex,  
44 nonalcoholic energy intake, smoking, and alcohol. The effect sizes were attenuated and reached a  
45 non-significant level when BMI and sports participation were added to the model. Most of the  
46 associations were replicated in the within-pair analyses among all twin pairs and among dizygotic

47 twin pairs, but the effect sizes tended to be smaller among monozygotic twin pairs. This suggests  
48 that genetics, but not a shared environment, may partially explain the observed associations  
49 between diet and biological aging.

50 **Conclusion** Diets high in fast food, processed red meat, and sugar-sweetened beverages and low in  
51 fruits and vegetables are associated with accelerated biological aging in young adulthood. The  
52 clustering effect of lifestyle factors and genetic confounders should be considered when interpreting  
53 the findings.

54 **Keywords:** diet, nutrition, biological aging, epigenetic clock, twin study

## 55 INTRODUCTION

56 Diet quality is a modifiable lifestyle factor that significantly impacts mortality and morbidity risks  
57 (1–3). Diet-related noncommunicable diseases, such as cardiovascular diseases and type 2 diabetes,  
58 are among the leading causes of death worldwide (4,5). Health-promoting diets—that is, those rich  
59 in vegetables, fruits, legumes, nuts, whole grains, vegetable oils, and fish and low in red and  
60 processed meat, high-fat dairy, and refined carbohydrates—play a crucial role in reducing the risk  
61 of these diseases (2,3) and all-cause mortality (1).

62 One mechanism by which diet can influence health and lifespan involves changes in the epigenome,  
63 which further modify pathways leading to diseases (6). Epigenetic modifications alter gene  
64 expression without changing the DNA sequence (7). The most well-established and valuable  
65 epigenetic marker in human disease studies is DNA methylation (DNAm) (8,9). This marker  
66 typically involves the attachment of a methyl group to a cytosine-phosphate-guanine (CpG)  
67 dinucleotide on a DNA strand (10). The activity of DNAm varies depending on its genomic  
68 location. Methylation of DNA promoters often suppresses gene expression, whereas methylation of  
69 gene bodies can enhance gene expression (11–13). Although genetic factors contribute to DNAm,  
70 environmental and lifestyle factors also play a significant role in this process (14). Genetic factors  
71 seem to play a larger role in young individuals, whereas environmental and lifestyle factors explain  
72 more of the variation in DNAm in older cohorts (14).

73 Epigenetic alterations are one of the classical hallmarks of aging (15), and DNAm status at a set of  
74 specific CpG sites can be used to estimate individuals' biological age. To date, several epigenetic  
75 clocks (i.e., machine learning algorithms that utilize different CpG sites) have been validated to  
76 predict aging-related phenotypes (16,17). The first two widely used clocks, the Hannum and  
77 Horvath clocks, were developed to estimate chronological age (18,19). More recent “second- and  
78 third-generation clocks,” GrimAge and DunedinPACE, were developed to predict lifespan and the  
79 pace of aging, respectively, rather than chronological age (20,21). For GrimAge, the difference

80 between the estimated biological age and chronological age indicates age acceleration, whereas  
81 DunedinPACE directly provides an index of the pace of aging—that is, an average rate of years of  
82 biological aging per year of chronological aging. Increased age acceleration and an increased pace  
83 of aging have been shown to predict morbidity and mortality in several cohorts (20–24).

84 Some observational studies have found a relationship between higher diet quality and age  
85 deceleration (25–29). However, most current evidence comes from middle-aged and older adults.  
86 During young adulthood (between the ages of 18 and 35), individuals transition from adolescence to  
87 a stage where they begin to manage the responsibilities associated with independent living (30).  
88 This phase of life may involve leaving the parental home, starting work or academic education, and  
89 beginning a relationship or parenthood, all of which have the potential to affect dietary patterns  
90 (30–32). It has been reported that diet quality tends to decrease during the transition from  
91 adolescence to young adulthood (33). As diseases usually take decades to manifest, it is important  
92 for disease prevention to investigate the link between diet and health from an early age before  
93 clinical signs of age-related diseases appear. Epigenetic clocks, especially newer ones, emerge as a  
94 potential metric for this purpose.

95 Previous studies examining the relationship between diet and biological aging have not accounted  
96 for genetic liability or shared familial confounders. In addition, previous studies investigating the  
97 association between diet and biological aging have used theory-based *a priori* methods, i.e., dietary  
98 indices, to assess diet quality (25–28). Instead, *a posteriori* methods provide a hypothesis-free,  
99 empirically informed approach to analyzing dietary patterns, which are the overall combinations of  
100 foods and beverages typically consumed (3). Latent class analysis (LCA) is one such person-  
101 oriented, data-driven method used to identify unobserved subgroups within a population based on  
102 patterns of responses across multiple observed variables (34). In this paper, we investigated the  
103 association between LCA-derived dietary patterns and biological aging in young adult twins. In

104 addition to individual-level analyses, we employed within–twin pair analyses to account for shared  
105 environment and genetics.

106

## 107 **MATERIALS AND METHODS**

### 108 *Study design and participants*

109 This study utilized data from the fourth wave of the intensively studied sample of the FinnTwin12  
110 study, collected between 2006 and 2009. FinnTwin12 is a population-based longitudinal study  
111 comprising Finnish twins born between 1983 and 1987 (35,36). The intensively studied sample  
112 (1035 families) was created through random sampling from each birth cohort when the twins were  
113 11–12 years old. The sample was enriched to include individuals at familial risk of alcoholism.  
114 Specifically, all remaining twins in each cohort, where one or both parents exceeded the threshold  
115 on a questionnaire assessing alcoholism (the Malmö-modified Michigan Alcoholism Screening  
116 Test; Mm-MAST 37), were added to the randomly selected sample. These families comprised 28%  
117 of the overall sample. At the age of 14, 1852 twins were interviewed and later invited to participate  
118 in the fourth study wave as young adults.

119 The data for the fourth wave were gathered during in-person study visits when the twins were  
120 between the ages of 20 and 26 years. A total of 1347 twins (73% participation rate) underwent  
121 assessments at this phase. Dietary data were available for 1294 participants. Of these, 839 also had  
122 epigenome data from blood samples. Four participants later withdrew their consent to participate in  
123 the study, eight participants were excluded due to incomplete dietary data (>8 items missing in the  
124 food frequency questionnaire), and one was excluded due to implausibly low energy intake (<600  
125 kcal/day in females). This resulted in a final sample size of 826 for the individual analyses. For the  
126 within–twin pair analyses, 100 individuals for whom we did not have valid data on their cotwin

127 were excluded from the data, resulting in a sample of 726 individuals—that is, 363 complete twin  
128 pairs of which 206 were dizygotic (DZ) and 157 monozygotic (MZ).

129 All participants provided written informed consent. The data were collected according to the  
130 principles of the Declaration of Helsinki, and the study was approved by the Institutional Review  
131 Board of Indiana University and the ethics committees of the University of Helsinki and Helsinki  
132 University Central Hospital (113/E3/2001 and 346/E0/05).

### 133 *Dietary intake*

134 Habitual dietary intake was assessed through a food frequency questionnaire containing 52 foods  
135 and nonalcoholic beverages. A detailed description of the dietary assessments was provided  
136 elsewhere (38). Briefly, the participants were asked about the typical frequency of 52 foods and  
137 nonalcoholic beverages consumed during the previous 12 months. Additionally, they reported the  
138 number of slices of rye bread, whole grain bread, and white bread consumed daily. The participants  
139 also reported the amount of fat spread per slice of bread. The intake of each food and beverage item  
140 in grams per day and the daily macronutrient and nonalcoholic energy intake were calculated using  
141 the national computer-based food composition database Fineli ([www.fineli.fi](http://www.fineli.fi)).

### 142 *DNA methylation and biological age*

143 Genomic DNA was isolated from venous blood samples using commercial kits. DNA samples of 1  
144 µg were then bisulfite-converted using an EZ-96 DNA Methylation-Gold Kit (Zymo Research,  
145 Irvine, CA) following the manufacturer's instructions. The samples from both twins were  
146 distributed on the same plate to minimize potential batch effects. Measurements of DNA  
147 methylation were performed using Illumina's Infinium HumanMethylation450 BeadChip (covering  
148 over 450,000 CpGs) for 742 samples and the Infinium MethylationEPIC BeadChip (covering  
149 850,000 CpGs; Illumina, San Diego, CA) for 84 samples. Methylation data were combined and

150 preprocessed using the R package *meffil* (39). The preprocessing steps have been previously  
151 described in detail (40).

152 Two epigenetic clocks—namely, principal component (PC)–based GrimAge (20,41) and  
153 DunedinPACE (21)—were used in this study. GrimAge, established in 2019, uses 1030 CpGs to  
154 predict time-to-death and is a composite measure incorporating chronological age, sex, and DNAm-  
155 based surrogate biomarkers related to seven plasma proteins and smoking pack-years (20). To  
156 increase reproducibility, we utilized the PC version of GrimAge (PC-GrimAge) in the analysis  
157 because it is less sensitive to technical noise arising from DNAm data compared to the original  
158 DNAm GrimAge (41). DunedinPACE, established in 2022, is an updated version of the 2020 clock  
159 DunedinPoAm (42). It was trained to predict changes in 19 biomarkers from age 26 to age 45,  
160 utilizing 173 CpGs to forecast the pace of aging (21).

161 PC-GrimAge and DunedinPACE estimates were produced using R packages  
162 (<https://github.com/MorganLevineLab/PC-Clocks> and <https://github.com/danbelsky/DunedinPACE>,  
163 respectively; 18,19). PC-GrimAge acceleration (AAPC-Grim), which reflects the difference  
164 between chronological age and biological age assessed by PC-GrimAge, was calculated as the  
165 residual from a regression model in which the estimated biological age was regressed on  
166 chronological age. The epigenetic aging measures were screened for outliers (values more than 5  
167 standard deviations from the mean). No outliers were detected.

#### 168 *Lifestyle-related covariates*

169 BMI ( $\text{kg/m}^2$ ) was calculated using the height and weight measured at the study visit. Sports-related  
170 physical activity was assessed using the Baecke questionnaire (43). The participants reported the  
171 number of months per year and hours per week they participated in their two most regularly  
172 practiced types of exercise. The sport index was calculated based on the volumes and intensities of  
173 the reported activities, as described by Baecke et al. (43) and Mustelin et al. (44).



174 Smoking status, categorized as never smokers, former smokers, occasional smokers, and daily  
175 smokers, was self-reported by the participants. The number of servings of beer, wine, spirits, and  
176 other alcoholic beverages consumed during a typical week was assessed through a detailed  
177 interview as part of the Semi-Structured Assessment of Genetics of Alcoholism (SSAGA; 45). To  
178 calculate alcohol intake in grams, the number of servings of each beverage type consumed per week  
179 was multiplied by the respective portion sizes and alcohol content. This yielded the total weekly  
180 alcohol intake. Subsequently, the weekly alcohol intake in grams was divided by 7 to determine the  
181 average daily intake.

### 182 *Statistical analyses*

183 We employed LCA to identify different dietary patterns. The intake of each food and nonalcoholic  
184 beverage item was used as an indicator variable. Prior to conducting LCA, the items were log-  
185 transformed due to their skewed distributions. For indicators with a strong floor effect (8 out of 55  
186 indicators), the variables were recoded as binary, indicating whether or not the participants  
187 consumed the corresponding food item. An LCA model with 1–7 classes was fitted. The  
188 classification was based on the means and variations of the continuous indicator variables and the  
189 conditional item probabilities of the binary indicators. In each step, we used the following indices to  
190 evaluate the goodness of fit: Akaike’s information criterion, the Bayesian information criterion  
191 (BIC), and the sample size–adjusted BIC (aBIC). Lower values of the information criteria suggest a  
192 better fit for the model. Moreover, we used likelihood-based tests—namely, the Vuong–Lo–  
193 Mendell–Rubin likelihood ratio test (VLMR-LRT) and the Lo–Mendell–Rubin (LMR) test—to  
194 assess whether adding a class led to a statistically significant improvement in model fit. A low p-  
195 value suggests that the model with one class less should be rejected. In each step, classification  
196 quality was assessed using the average posterior probabilities for the likeliest latent class  
197 membership (AvePP) and the entropy values. Entropy values higher than 0.8 indicate that the  
198 classification uncertainty is low (46). AvePPs close to 1 indicate a clear classification. To simplify

199 further analysis, the classification error was ignored, and each participant was assigned to the class  
200 for which the posterior membership probability was the largest (modal assignment).

201 Linear regression modeling was conducted to study the differences in biological aging between  
202 classes with different dietary patterns. Covariates were sequentially added to the model. The  
203 standard errors were corrected for nested sampling within families using the “type=complex” option  
204 in Mplus. Following these individual-level analyses, the associations were estimated at the within-  
205 twin pair level using multilevel models in all twin pairs and separately for MZ and DZ pairs (47).  
206 This approach addresses shared environmental factors, either measured or unmeasured, across all  
207 twin pairs. Additionally, within MZ pairs, which share all their genetic variants, this method  
208 accounts for genetic influences, while in DZ twin comparisons, it addresses, on average, 50% of the  
209 segregating genetic influences.

210 We also assessed whether sex, nonalcoholic energy intake, smoking status, alcohol consumption,  
211 BMI, or sports participation may modify the impact of diet on biological aging by incorporating an  
212 interaction term into our models. The Wald test was used to test the significance of the interaction  
213 term.

214 Descriptive statistics were analyzed using SPSS version 28.0 (Armonk, NY: IBM Corp). LCA and  
215 regression modeling were conducted using Mplus software version 8.2 (48). The parameters of the  
216 models were estimated using the full information maximum likelihood (FIML) method with robust  
217 standard errors. This approach produces unbiased parameter estimates when data are missing at  
218 random (MAR). In all statistical tests, the alpha level of significance was set at 0.05.

219

## 220 **RESULTS**

221 The demographic and dietary characteristics of the whole sample and stratified by sex are presented  
222 in Table 1. On average, the participants were 22.4 (0.7) years old, with an age range of 21–25 years,

223 with 58.2% being female. Compared to females, males had a higher BMI and alcohol intake and  
 224 smoked more frequently. In addition, males exhibited higher absolute energy and macronutrient  
 225 intakes, while females consumed a higher percentage of carbohydrates relative to their total energy  
 226 intakes.

227 Table 1. Demographic and dietary characteristics of the whole sample and stratified by sex.

|                                                         | Whole sample<br>(n=826) | Males<br>(n=345)        | Females<br>(n=481)     |
|---------------------------------------------------------|-------------------------|-------------------------|------------------------|
| Age, years, mean (SD)                                   | 22.4 (0.7)              | 22.5 (0.7)              | 22.4 (0.7)             |
| Sex                                                     |                         |                         |                        |
| Males, n (%)                                            | 345 (41.8)              | -                       | -                      |
| Females, n (%)                                          | 481 (58.2)              | -                       | -                      |
| Zygoty                                                  |                         |                         |                        |
| MZ, n (%)                                               | 342 (41.4) <sup>a</sup> | 127 (36.9) <sup>b</sup> | 215 (44.7)             |
| SS-DZ, n (%)                                            | 262 (31.7) <sup>a</sup> | 117 (34.0) <sup>b</sup> | 145 (30.1)             |
| OS-DZ, n (%)                                            | 221 (26.8) <sup>a</sup> | 100 (29.1) <sup>b</sup> | 121 (25.2)             |
| BMI, kg/m <sup>2</sup> , median (25th, 75th percentile) | 22.6 (20.8, 25.1)       | 23.5 (21.7, 25.4)       | 22.1 (20.3, 24.5)      |
| The Baecke sport index, mean (SD)                       | 3.0 (0.8) <sup>c</sup>  | 3.1 (0.8) <sup>d</sup>  | 2.9 (0.8) <sup>e</sup> |
| Smoking status                                          |                         |                         |                        |
| Never, n (%)                                            | 438 (53.0)              | 165 (47.8)              | 273 (56.8)             |
| Former, n (%)                                           | 69 (8.4)                | 36 (10.4)               | 33 (6.9)               |
| Occasional, n (%)                                       | 91 (11.0)               | 37 (10.7)               | 54 (11.2)              |
| Daily, n (%)                                            | 228 (27.6)              | 107 (31.0)              | 121 (25.2)             |
| Alcohol intake, g/d, median (25th,75th percentile)      | 7.7 (0.0, 17.1)         | 12.0 (1.7, 25.3)        | 5.1 (0.0, 12.0)        |
| Nonalcoholic energy intake, kcal/d, mean (SD)           | 2191 (650)              | 2543 (683)              | 1938 (489)             |
| Carbohydrate intake, g/d, mean (SD)                     | 281 (82)                | 313 (88)                | 258 (69)               |
| Carbohydrate intake, E%, mean (SD)                      | 46.8 (5.2)              | 45.0 (4.9)              | 47.9 (5.1)             |
| Protein intake, g/d, mean (SD)                          | 89 (30)                 | 106 (32)                | 76 (21)                |
| Protein intake, E%, mean (SD)                           | 16.2 (2.5)              | 16.7 (2.4)              | 15.8 (2.5)             |
| Fat intake, g/d, mean (SD)                              | 74 (27)                 | 87 (28)                 | 65 (21)                |
| Fat intake, E%, mean (SD)                               | 30.2 (4.8)              | 30.8 (4.6)              | 29.7 (5.0)             |

228 <sup>a</sup> n=825; <sup>b</sup> n=344; <sup>c</sup> n=800; <sup>d</sup> n=338; <sup>e</sup> n=462

229 SD, standard deviation; MZ, monozygotic twins; SS-DZ, same-sex dizygotic twins; OS-DZ, opposite-sex dizygotic  
 230 twins; BMI, body mass index; E%, energy percentage.

231

232 The LCA models with 1 to 7 classes are shown in Table S1. The VLMR-LRT and LMR test  
 233 indicated that even a 2-class model would be sufficient. However, the model fit improved based on  
 234 the information criteria until the inclusion of the sixth class in the model. The entropy reached its  
 235 maximum level in the sixth step as well. Consequently, a 6-class solution was selected for further  
 236 analysis.

237 Fig. 1 shows the mean consumption of each food for different dietary patterns. The probabilities of  
 238 consumption of different food items treated as binary variables in the LCA are presented in a

239 separate figure in the Supplement (Fig. S1). We named the dietary patterns as follows: 1) High fast  
240 food, low fruits and vegetables (F&V), 2) Plant-based, 3) Health-conscious, 4) Western with  
241 infrequent fish, 5) Western with regular fish, and 6) Balanced average.

242 The High fast food, low F&V pattern was characterized by relatively high intakes of high-fat,  
243 processed meat, fast food (i.e., hamburgers, pizza, pastry, fried potatoes, and French fries), sugar-  
244 sweetened beverages, and margarine-butter blend. In turn, individuals with this dietary pattern  
245 consumed lower quantities of vegetables, fruits, berries, grain products, fish, yogurt, low-fat cheese,  
246 fat-free milk, and vegetable oils. Overall, participants in the High fast food, low F&V pattern  
247 reported a relatively low frequency of food item consumption.

248 The participants in the Plant-based pattern tended to consume high amounts of vegetables, fruits,  
249 berries, porridge, muesli or cereals, chocolate, yogurt, tea, and vegetable oils and low quantities of  
250 fast food, fish, meat, boiled or mashed potatoes, and soft drinks.

251 The participants in the Health-conscious pattern favored low-fat products, such as low-fat meat, fat-  
252 free milk, and low-fat cheese. Their intake of vegetables, fruits, berries, rye bread, and porridge was  
253 also high. In turn, the intake of fast food, high-fat meat, soft drinks, and fruit juices was low in the  
254 Health-conscious pattern.

255 The Western with infrequent fish pattern was characterized by high intakes of meat, fast food, soft  
256 drinks, and margarine-butter blend and lower intakes of rye bread, porridge, boiled potatoes,  
257 vegetables, fruits, berries, yogurt, low-fat cheese, fish, and vegetable oils. This pattern was  
258 relatively similar to the High fast food, low F&V pattern; however, the latter consumed even lower  
259 amounts of vegetables, fruits, and berries.

260 The participants with a Western in regular fish dietary pattern consumed high amounts of rice or  
261 pasta, meat, fish, fast food, sugar-free drinks, soft drinks, fruit juice, low-fat milk, coffee, and  
262 margarine-butter blend and relatively low amounts of vegetables, fruits, berries, desserts, and

263 vegetable oils. Overall, the participants in this pattern reported high intakes of different food items.  
264 Thus, the absolute and relative intakes of vegetables, fruits, and berries were higher in this pattern  
265 than in the High fast food, low F&V pattern.

266 Finally, the participants in the Balanced-average dietary pattern tended to consume high amounts of  
267 rye bread, porridge, fish, vegetables, fruits, berries, desserts, and tea and lower amounts of high-fat  
268 meat, margarine-butter blend, and coffee, but the intake of other food and beverage items was  
269 average.

270 The characteristics of the participants with different dietary patterns are presented in Table S2. In  
271 general, males tended to be in the majority in the Western with infrequent fish and Western with  
272 regular fish dietary patterns; these groups were also characterized by the highest BMIs, alcohol  
273 consumption, and nonalcoholic energy and fat intakes. Instead, females predominated in the groups  
274 with Plant-based, Health-conscious, and Balanced-average dietary patterns. These patterns included  
275 the highest rates of never smokers and were characterized by relatively low alcohol intake and  
276 higher carbohydrate consumption relative to the total energy intake.

277 The individual-level associations between dietary patterns and biological aging among the entire  
278 sample are presented in Fig. 2. The High fast food, low F&V pattern was treated as the reference  
279 group, as it exhibited the highest age acceleration and pace of aging in Model 1 (adjusted for family  
280 relatedness, daily nonalcoholic energy intake, and sex). Compared to the High fast food, low F&V  
281 pattern, AAPC-Grim was slower in the Plant-based ( $\beta=-0.122$ , 95% confidence interval [CI] -0.207,  
282 -0.037), Health-conscious ( $\beta=-0.171$ , 95% CI -0.269, -0.073), and Balanced-average patterns ( $\beta=-$   
283 0.198, 95% CI -0.298, -0.099) in Model 1. After further adjustment for smoking status and alcohol  
284 intake (Model 2), the strength of these associations decreased but remained statistically significant  
285 ( $\beta=-0.077$ , 95% CI -0.152, -0.002;  $\beta=-0.112$ , 95% CI -0.200, -0.025; and  $\beta=-0.148$ , 95% CI -0.236,  
286 -0.061, respectively). After additional adjustment for the BMI and the Baecke sport index (Model  
287 3), the strength of the associations was further attenuated, and the associations of the Plant-based

288 and Balanced-average patterns with the High fast food, low F&V pattern became statistically  
289 insignificant ( $\beta=-0.059$ , 95% CI -0.133, 0.016;  $\beta=-0.087$ , 95% CI -0.178, 0.005, respectively).  
290 However, the association between the Balanced-average and the High fast food, low F&V patterns  
291 remained statistically significant in Model 3 ( $\beta=-0.131$ , 95% CI -0.218, -0.044; Fig. 2).

292 In addition to using the High fast food, low F&V pattern as a reference group, we also conducted  
293 pairwise comparisons with other classes serving as the reference. In these comparisons, AAPC-  
294 Grim was faster in the Western with infrequent fish pattern compared to the Balanced-average  
295 pattern in Models 1 and 2 ( $\beta=0.134$ , 95% CI 0.039, 0.229 and  $\beta=0.093$ , 95% CI 0.004, 0.183,  
296 respectively; results not shown). In Model 3, the effect size continued to attenuate from Models 1  
297 and 2, with the association reaching a non-significant level ( $\beta=0.077$ , 95% CI -0.010, 0.164). In  
298 addition, in Model 1, AAPC-Grim was slower in the Health-conscious pattern compared to the  
299 group with a Western with infrequent fish dietary pattern ( $\beta=-0.100$ , 95% CI -0.188, -0.011). The  
300 effect sizes were attenuated in Models 2 and 3, with the association reaching a non-significant level  
301 ( $\beta=-0.052$ , 95% CI -0.139, 0.035 and  $\beta=-0.028$ , 95% CI -0.116, 0.061 in Models 2 and 3,  
302 respectively). Furthermore, AAPC-Grim was faster in the group with a Western with regular fish  
303 pattern than in that with a Balanced-average pattern in Model 1 ( $\beta=0.104$ , 95% CI 0.011, 0.197),  
304 with the effect sizes reducing to statistically insignificant levels in Models 2 ( $\beta=0.030$ , 95% CI -  
305 0.056, 0.115) and 3 ( $\beta=0.024$ , 95% CI -0.059, 0.107). No other statistically significant differences  
306 were observed in pairwise comparisons for AAPC-Grim.

307 Regarding DunedinPACE, the only significant difference from the High fast food, low F&V pattern  
308 was observed in the Plant-based pattern, which exhibited a slower pace of aging in Models 1 and 2  
309 ( $\beta=-0.134$ , 95% CI -0.223, -0.045 and  $\beta=-0.109$ , 95% CI -0.194, -0.023, respectively). The strength  
310 of this association was modestly attenuated and became statistically non-significant in Model 3 ( $\beta=-$   
311 0.080, 95% CI -0.164, 0.004; Fig. 2). In other pairwise comparisons, the Plant-based pattern was  
312 associated with a slower pace of aging compared to the Western with infrequent fish pattern in

313 Models 1 and 2 ( $\beta=-0.106$ , 95% CI -0.186, -0.026 and  $\beta=-0.085$ , 95% CI -0.164, -0.006,  
314 respectively; results not shown). The strength of this association continued to decrease and became  
315 statistically non-significant in Model 3 ( $\beta=-0.057$ , 95% CI -0.132, 0.018). Additionally, the pace of  
316 aging was slower in the Plant-based pattern compared to the Western with frequent fish pattern in  
317 Model 1 ( $\beta=-0.101$ , 95% CI -0.196, -0.006), but the effect sizes decreased in Models 2 and 3 ( $\beta=-$   
318  $0.059$ , 95% CI -0.153, 0.035 and  $\beta=-0.039$ , 95% CI -0.127, 0.050, respectively).

319 The associations between dietary patterns and biological aging stratified by sex are presented in  
320 Supplementary Figures (Fig. S2, Fig. S3). Regarding AAPC-Grim, no major differences were  
321 observed between the sexes, and the effect sizes were approximately similar to those observed in  
322 the whole sample. However, when DunedinPACE was used as an outcome variable, the  
323 associations were stronger among males than females. Among males, the pace of aging was  
324 significantly slower in the Balanced-average pattern compared to the High fast food, low F&V  
325 pattern in all Models ( $\beta=-0.164$ , 95% CI -0.283, -0.045;  $\beta=-0.121$ , 95% CI -0.235, -0.007; and  $\beta=-$   
326  $0.123$ , 95% CI -0.232, -0.013 in Models 1, 2, and 3, respectively). In contrast, most effect sizes  
327 among females were close to zero.

328 We also tested for potential interactions in the individual-level analyses in Model 3 to evaluate  
329 whether sex- or lifestyle-related covariates may modify the association between diet and biological  
330 aging. An interaction was observed between BMI and dietary patterns in a model with AAPC-Grim  
331 ( $p<0.001$ ; Fig. S4). Since it was thought that the association between BMI and biological aging  
332 could be curvilinear, we conducted a sensitivity analysis in which the quadratic term of BMI and its  
333 interactions with diet were included in the model. An interaction between the quadratic term and  
334 dietary patterns was observed ( $p=0.006$ ), indicating a curvilinear association that varies across  
335 dietary patterns (Fig. 3). At low levels of BMI, biological aging was accelerated in High fast food,  
336 low F&V pattern compared to other dietary patterns. The interaction term between BMI and diet  
337 was non-significant in a model with DunedinPACE ( $p=0.350$ ). The association between diet and

338 both of the epigenetic aging measures was independent of sex, nonalcoholic energy intake, smoking  
339 status, alcohol consumption, and the Baecke sport index ( $p$  for interaction  $>0.05$  in all).

340 Furthermore, we examined the similarity of the MZ and DZ twin pairs in terms of dietary pattern  
341 membership by comparing the proportions of concordant and discordant twin pairs. Among the MZ  
342 pairs, the ratio of the proportions of concordant twin pairs for dietary pattern membership to  
343 discordant pairs was 0.78 (43.9%/56.1%). The corresponding ratio among the DZ pairs was 0.32  
344 (24.3%/75.7%). The higher proportion of concordant pairs among the MZ compared to the DZ twin  
345 pairs suggests genetic influences on dietary habits. The results of the within-pair analyses are  
346 presented in Figs. 4 and 5. The associations observed in the individual-level analyses were  
347 replicated in the within-twin pair analyses conducted for all twin pairs and DZ twin pairs; however,  
348 the effect sizes tended to be smaller for the MZ twin pairs, particularly in our fully adjusted models.

349

## 350 **DISCUSSION**

351 In this study, we investigated the associations between LCA-derived dietary patterns and biological  
352 aging among young adult twin pairs, both at the individual and within-twin pair levels. In general,  
353 diets emphasizing higher consumption of fruits and vegetables and lower intakes of meat, fast food,  
354 and sugar-sweetened beverages were associated with slower biological aging, while diets low in  
355 fruits and vegetables and high in meat, fast food, and sugar-sweetened beverages were linked to  
356 faster biological aging. However, the strengths of the associations were significantly attenuated  
357 when additional lifestyle factors were considered covariates. The associations between diets and  
358 biological aging differed according to sex when DunedinPACE was used to estimate biological  
359 aging but not when PC-GrimAge was applied. The associations found at the individual level were  
360 replicated at the within-pair level in all pairs and in the DZ pairs but were attenuated in the MZ  
361 pairs, suggesting the presence of genetic confounding.



362 Previous studies have mostly assessed diet quality using different dietary indices and have shown  
363 that higher-quality dietary patterns are associated with decreased biological aging (25–29,49,50).  
364 For example, two studies (25,26) found an association between lower Dietary Approaches to Stop  
365 Hypertension (DASH) scores (i.e., lower-quality diets) and age acceleration. Kresovich et al. (25)  
366 examined the links between the Healthy Eating Index, Alternative Healthy Eating Index, and  
367 Alternative Mediterranean diet with age acceleration and found inverse associations between all  
368 these metrics and age acceleration, indicating that higher diet quality is associated with slower age  
369 acceleration. In addition, Li et al. (27) found a link between higher scores of the Alternative Healthy  
370 Eating Index, the Mediterranean Dietary Score, and the Dietary Inflammatory Index with slower  
371 biological aging, both cross-sectionally and longitudinally. While the above-mentioned studies were  
372 conducted in middle-aged and older adults, Thomas et al. (28) reported that an association between  
373 a higher Mediterranean diet score and younger biological age was also observed among 20–40-  
374 year-old participants.

375 Dietary indices are, however, different from the LCA-derived dietary patterns used in this study.  
376 The former is a theory-based method, whereas LCA is a data-driven approach, therefore able to  
377 identify unobserved subgroups within a population instead of theory-driven index scores. Thus, our  
378 results are not directly comparable to those of earlier studies. However, the dietary patterns  
379 associated with slower biological aging in our study have similar characteristics to those with high  
380 dietary index scores, such as high intake of vegetables and fruits and low intake of processed meat  
381 and sugar-sweetened beverages.

382 One potential mechanism that may underlie the association between a healthier diet and slower  
383 biological aging could involve the intake of polyphenols. Polyphenols (i.e., phenolic acids,  
384 flavonoids, stilbenoids, and lignans) are found mainly in vegetables, fruits, berries, nuts, herbs, soy,  
385 tea, coffee, cocoa, and olive oil (51). Polyphenols have been reported to cause both direct and  
386 indirect modifications to the levels and activity of DNA methyltransferases (DNMTs) (52). DNMTs

387 are enzymes that transfer a methyl group to the 5-carbon position of cytosine and are thus  
388 responsible for both de novo methylation processes and their maintenance (53). Hence, diets rich in  
389 polyphenols may result in favorable changes in DNAm levels and at least partly explain the slower  
390 age acceleration observed in patterns with high intakes of vegetables and fruits.

391 Moreover, high consumption of red meat is associated with accelerated biological aging when  
392 estimated by the Horvath clock, PhenoAge, and GrimAge metrics (20,54,55). Consistent with these  
393 findings, we also observed that dietary patterns rich in red meat and processed red meat (e.g.,  
394 salami, sausage dishes) were associated with faster biological aging compared to diets with lower  
395 meat intake. Potential mechanisms behind these associations include the detrimental effects of high  
396 intakes of heme iron and the presence of heterocyclic amines (HAAs) and polycyclic aromatic  
397 hydrocarbons (PAHs) found on the surface of charred meat, all of which have been suggested to  
398 have carcinogenic effects (56). Additionally, saturated fats found in meat, as well as sodium and  
399 nitrates found in processed red meat, have been associated with an increased risk of cardiovascular  
400 diseases and cancer (56,57). However, it was not within the scope of our study to investigate the  
401 role of a single food item in biological aging. In fact, since high meat consumption coincided with  
402 low vegetable intake and high consumption of sugar-sweetened beverages, it is impossible to isolate  
403 the specific role of red meat consumption from other dietary characteristics.

404 It has been shown that modifiable lifestyle habits, such as smoking, alcohol consumption, physical  
405 activity, and dietary choices, tend to cluster among both adolescents and adults (58–61). In line with  
406 this finding, we found that smoking status, alcohol intake, BMI, and sports participation varied  
407 across the different dietary patterns. Therefore, as seen in Figs. 2, 4, and 5, the strengths of the  
408 observed associations between diet and biological aging decreased after adjusting for other lifestyle  
409 factors. This suggests that although dietary factors may be at least partially independently  
410 associated with biological aging, some associations appear to be confounded by other aspects of  
411 lifestyle. For example, Thomas et al. (28) reported that the associations between a healthy diet and

412 physical activity with younger biological age were additive, in that low diet quality can be partially  
413 compensated by higher physical activity levels. In addition, obesity was associated with older  
414 biological age compared to normal weight, even in participants with a high diet quality (28).

415 Regarding sex differences, we found that the associations between diet and biological aging did not  
416 differ between males and females when PC-GrimAge was used as an outcome variable. However,  
417 we found a difference between sexes regarding the pace of aging, with the association being strong  
418 in males and nonexistent in females after adjusting for other lifestyle factors. This finding is in  
419 contrast to the results of a previous study (28), which found that the effect sizes in the association  
420 between the Mediterranean Diet score and the PhenoAge metric were slightly stronger in females  
421 than in males. As few studies have investigated the correlation between diet and biological aging  
422 separately for both sexes, further studies with larger sample sizes and different biological aging  
423 metrics should address this issue.

424 Interestingly, we found an interaction between BMI and dietary patterns in the AAPC-Grim model.  
425 More specifically, among individuals with low BMI values, biological aging was accelerated in the  
426 High fast food, low F&V group compared to all other groups, whereas among those with higher  
427 BMI values (especially those with overweight or obesity), AAPC-Grim yielded lower values in the  
428 High fast food, low F&V group. Our results suggest that among individuals with diets characterized  
429 by low consumption of vegetables, fruits, and berries and relatively high intake of meat, fast foods,  
430 and sugar-sweetened beverages, a lower BMI may be associated with greater age acceleration  
431 compared to individuals with similar diets but higher BMIs. The mechanisms behind this  
432 phenomenon remain elusive but may be related to low or inadequate intake of essential nutrients in  
433 those with low BMI. At the same time, we cannot exclude the possibility that some confounders  
434 were not addressed in our analysis. For instance, genetic predispositions, certain diseases, stress,  
435 socioeconomic status, or unmeasured lifestyle factors may have influenced our findings. However,

436 the results indicate a synergistic influence of diet and BMI on biological aging, at least when  
437 AAPC-Grim is used as the metric for biological aging.

438 Our findings of more similar dietary patterns among MZ twins compared to DZ twins align with the  
439 results of earlier studies showing that among adults, genetic factors explain dietary patterns more  
440 than the shared childhood and youth environment (62–64). In addition, our finding that the  
441 associations observed in the individual-level analyses were replicated at the pairwise level among  
442 all pairs and among the DZ pairs suggests that shared environmental factors might not explain the  
443 observed associations between diet and biological aging. In contrast, the smaller effect sizes in the  
444 MZ twin pairs compared with the DZ twin pairs suggest that the relationship between diet and  
445 biological aging may be at least partially confounded by genetics.

446 Our study is not without limitations. First, the data were collected at one time point, thus limiting  
447 the interpretation of causal associations. However, reverse causality seems unlikely to explain our  
448 findings, as biological aging is not expected to influence dietary habits. Instead, residual  
449 confounding likely influenced our results, as demonstrated by the decreased effect sizes with the  
450 addition of covariates. The possibility that some residual confounders may still affect our fully  
451 adjusted models cannot be excluded. Second, the study participants were all of European ancestry  
452 based on genetic testing, which may limit the generalizability of our results to other ethnic groups.  
453 Third, dietary intakes were self-reported, which raises the possibility of misreporting. Finally, our  
454 study had a relatively small sample size, particularly in the Plant-based pattern, which may have led  
455 to limited statistical power to detect differences between dietary patterns. However, the strengths of  
456 our study include a high response rate, the utilization of a population-based cohort group, a twin  
457 study design, the use of the most recent biological aging metrics, and a person-centered approach to  
458 analyzing dietary patterns (i.e., LCA).

459

## 460 **CONCLUSION**

461 Our results suggest that diets low in fruits and vegetables and high in meat, fast food, and soft  
462 drinks are already associated with faster biological aging in young adulthood compared with diets  
463 high in fruits and vegetables and low in processed red meat and sugar-sweetened beverages. The  
464 findings of this study indicate that adhering to the recommended dietary habits from a young age  
465 may mitigate age-related health risks later in life. However, sex differences, variations in the  
466 metrics used to measure biological aging, clustering effects of healthy and unhealthy lifestyle habits  
467 on biological aging, and genetic confounding need to be considered when interpreting the findings.

468

## 469 **Acknowledgments**

470 We acknowledge all the participants involved in this study.

## 471 **Funding statement**

472 SR is supported by the Juho Vainio Foundation. ES is supported by the Research Council of  
473 Finland (grant numbers 358894, 361981, 341750, 346509, 260001), the Juho Vainio Foundation,  
474 the Päivikki and Sakari Sohlberg Foundation, and the Yrjö Jahnsson Foundation (6168). MO is  
475 supported by the Research Council of Finland (grant numbers 328685, 307339, 297908 and  
476 251316), Minerva Foundation, Liv o Hälsa sr., and the Sigrid Juselius Foundation. KHP is  
477 supported by the Research Council of Finland (grant numbers 272376, 266286, 314383, 335443),  
478 Finnish Medical Foundation, Signe and Ane Gyllenberg Foundation, Novo Nordisk Foundation  
479 (NNF10OC1013354, NNF17OC0027232, NNF20OC0060547), Finnish Diabetes Research  
480 Foundation, Paulo Foundation, University of Helsinki and Helsinki University Hospital, and  
481 Government Research Funds. AH is supported by the University of Helsinki, Faculty of Medicine,  
482 Doctoral School of Population Health (DOCPOP).

483 Phenotype and genotype data collection in the FinnTwin12 study has been supported by the  
484 Wellcome Trust Sanger Institute, the Broad Institute, ENGAGE – European Network for Genetic  
485 and Genomic Epidemiology, FP7-HEALTH-F4-2007, grant agreement number 201413, National  
486 Institute of Alcohol Abuse and Alcoholism (grants AA-12502, AA-00145, and AA-09203 to R J  
487 Rose; AA15416 and K02AA018755 to D M Dick; and AA015416 to Jessica Salvatore) and the  
488 Research Council of Finland (grants 100499, 205585, 118555, 141054, 264146 and 308248 to J  
489 Kaprio). J Kaprio acknowledges support by the Research Council of Finland (grants 265240,  
490 263278) and by the Research Council of Finland Centre of Excellence in Complex Disease Genetics  
491 (grants 312073, 336823 and 352792).

#### 492 **Conflict of interest**

493 None of the authors has a conflict of interest to declare.

#### 494 **Author contributions**

495 SR and ES designed the study. SR and AK designed and conducted the statistical analysis and  
496 interpreted and visualized the data. JK, KHP, and MO designed and collected the FinnTwin12 data.  
497 LB prepared the dietary data. AH preprocessed the DNAm data and computed the biological aging  
498 estimates. SR drafted the first version of the manuscript, and AK and ES made important  
499 contributions through their edits and suggestions. All authors read, revised, and approved the final  
500 manuscript.

#### 501 **Data statement**

502 Data are available for qualified researchers through a standardized application procedure (see the  
503 website (<https://thl.fi/en/research-and-development/thl-biobank/for-researchers>) for details.

504

505

506 References

- 507 1. English LK, Ard JD, Bailey RL, Bates M, Bazzano LA, Boushey CJ, et al. Evaluation of  
508 Dietary Patterns and All-Cause Mortality: A Systematic Review. *JAMA Netw Open*. 2021 Aug  
509 31;4(8):e2122277.
- 510 2. Jayedi A, Soltani S, Abdolshahi A, Shab-Bidar S. Healthy and unhealthy dietary patterns and  
511 the risk of chronic disease: an umbrella review of meta-analyses of prospective cohort studies.  
512 *Br J Nutr*. 2020 Dec 14;124(11):1133–44.
- 513 3. Mozaffarian D. Dietary and Policy Priorities for Cardiovascular Disease, Diabetes, and Obesity.  
514 *Circulation*. 2016 Jan 12;133(2):187–225.
- 515 4. Mensah GA, Fuster V, Murray CJL, Roth GA, null null, Mensah GA, et al. Global Burden of  
516 Cardiovascular Diseases and Risks, 1990-2022. *J Am Coll Cardiol*. 2023 Dec 19;82(25):2350–  
517 473.
- 518 5. Ong KL, Stafford LK, McLaughlin SA, Boyko EJ, Vollset SE, Smith AE, et al. Global,  
519 regional, and national burden of diabetes from 1990 to 2021, with projections of prevalence to  
520 2050: a systematic analysis for the Global Burden of Disease Study 2021. *Lancet*. 2023 Jul  
521 15;402(10397):203–34.
- 522 6. Ma J, Rebholz CM, Braun KVE, Reynolds LM, Aslibekyan S, Xia R, et al. Whole Blood DNA  
523 Methylation Signatures of Diet Are Associated With Cardiovascular Disease Risk Factors and  
524 All-Cause Mortality. *Circ Genom Precis Med*. 2020 Aug;13(4):e002766.
- 525 7. He L. Epigenetic Clock: A Novel Tool for Nutrition Studies of Healthy Ageing. *J Nutr Health*  
526 *Aging*. 2022 Apr 1;26(4):316–7.
- 527 8. Feinberg AP. The Key Role of Epigenetics in Human Disease Prevention and Mitigation. *N*  
528 *Engl J Med*. 2018 Apr 5;378(14):1323–34.
- 529 9. Jylhävä J, Pedersen NL, Hägg S. Biological Age Predictors. *EBioMedicine*. 2017 Jul 1;21:29–  
530 36.

- 531 10. Ryan J, Wrigglesworth J, Loong J, Fransquet PD, Woods RL. A Systematic Review and Meta-  
532 analysis of Environmental, Lifestyle, and Health Factors Associated With DNA Methylation  
533 Age. *J Gerontol A Biol Sci Med Sci*. 2020 Feb 14;75(3):481–94.
- 534 11. Yang X, Han H, De Carvalho DD, Lay FD, Jones PA, Liang G. Gene Body Methylation Can  
535 Alter Gene Expression and Is a Therapeutic Target in Cancer. *Cancer Cell*. 2014  
536 Oct;26(4):577–90.
- 537 12. Siegfried Z, Simon I. DNA methylation and gene expression. *WIREs Systems Biology and*  
538 *Medicine*. 2010;2(3):362–71.
- 539 13. Lister R, Pelizzola M, Dowen RH, Hawkins RD, Hon G, Tonti-Filippini J, et al. Human DNA  
540 methylomes at base resolution show widespread epigenomic differences. *Nature*. 2009  
541 Nov;462(7271):315–22.
- 542 14. Fraga MF, Ballestar E, Paz MF, Ropero S, Setien F, Ballestar ML, et al. Epigenetic differences  
543 arise during the lifetime of monozygotic twins. *Proc Natl Acad Sci U S A*. 2005 Jul  
544 26;102(30):10604–9.
- 545 15. López-Otín C, Blasco MA, Partridge L, Serrano M, Kroemer G. Hallmarks of aging: An  
546 expanding universe. *Cell*. 2023 Jan 19;186(2):243–78.
- 547 16. Duan R, Fu Q, Sun Y, Li Q. Epigenetic clock: A promising biomarker and practical tool in  
548 aging. *Ageing Res Rev*. 2022 Nov;81:101743.
- 549 17. Bell CG, Lowe R, Adams PD, Baccarelli AA, Beck S, Bell JT, et al. DNA methylation aging  
550 clocks: challenges and recommendations. *Genome Biol*. 2019 Nov 25;20(1):249.
- 551 18. Horvath S. DNA methylation age of human tissues and cell types. *Genome Biol*.  
552 2013;14(10):R115.
- 553 19. Hannum G, Guinney J, Zhao L, Zhang L, Hughes G, Sada S, et al. Genome-wide methylation  
554 profiles reveal quantitative views of human aging rates. *Mol Cell*. 2013 Jan 24;49(2):359–67.



- 555 20. Lu AT, Quach A, Wilson JG, Reiner AP, Aviv A, Raj K, et al. DNA methylation GrimAge  
556 strongly predicts lifespan and healthspan. *Aging (Albany NY)*. 2019 Jan 21;11(2):303–27.
- 557 21. Belsky DW, Caspi A, Corcoran DL, Sugden K, Poulton R, Arseneault L, et al. DunedinPACE,  
558 a DNA methylation biomarker of the pace of aging. Deelen J, Tyler JK, Suderman M, Deelen J,  
559 editors. *eLife*. 2022 Jan 14;11:e73420.
- 560 22. Marioni RE, Shah S, McRae AF, Chen BH, Colicino E, Harris SE, et al. DNA methylation age  
561 of blood predicts all-cause mortality in later life. *Genome Biol*. 2015 Jan 30;16(1):25.
- 562 23. Horvath S, Raj K. DNA methylation-based biomarkers and the epigenetic clock theory of  
563 ageing. *Nat Rev Genet*. 2018 Jun;19(6):371–84.
- 564 24. Chen BH, Marioni RE, Colicino E, Peters MJ, Ward-Caviness CK, Tsai PC, et al. DNA  
565 methylation-based measures of biological age: meta-analysis predicting time to death. *Aging*  
566 (Albany NY). 2016 Sep 28;8(9):1844–59.
- 567 25. Kresovich JK, Park YMM, Keller JA, Sandler DP, Taylor JA. Healthy eating patterns and  
568 epigenetic measures of biological age. *Am J Clin Nutr*. 2022 Jan 11;115(1):171–9.
- 569 26. Kim Y, Huan T, Joehanes R, McKeown NM, Horvath S, Levy D, et al. Higher diet quality  
570 relates to decelerated epigenetic aging. *Am J Clin Nutr*. 2022 Jan 11;115(1):163–70.
- 571 27. Li DL, Hodge AM, Cribb L, Southey MC, Giles GG, Milne RL, et al. Body size, diet quality,  
572 and epigenetic ageing: cross-sectional and longitudinal analyses. *J Gerontol A Biol Sci Med*  
573 *Sci*. 2024 Jan 24;glae026.
- 574 28. Thomas A, Belsky DW, Gu Y. Healthy Lifestyle Behaviors and Biological Aging in the U.S.  
575 National Health and Nutrition Examination Surveys 1999–2018. *J Gerontol A Biol Sci Med*  
576 *Sci*. 2023 Sep 1;78(9):1535–42.
- 577 29. He H, Chen X, Ding Y, Chen X, He X. Composite dietary antioxidant index associated with  
578 delayed biological aging: a population-based study. *Aging (Albany NY)*. 2024 Jan 2;16(1):15–  
579 27.

- 580 30. Allman-Farinelli M, Partridge SR, Roy R. Weight-Related Dietary Behaviors in Young Adults.  
581 Curr Obes Rep. 2016 Mar 1;5(1):23–9.
- 582 31. Edwards JSA, Meiselman HL. Changes in dietary habits during the first year at university.  
583 Nutrition Bulletin. 2003;28(1):21–34.
- 584 32. Smith KJ, McNaughton SA, Gall SL, Otahal P, Dwyer T, Venn AJ. Associations between  
585 Partnering and Parenting Transitions and Dietary Habits in Young Adults. J Acad Nutr Diet.  
586 2017 Aug 1;117(8):1210–21.
- 587 33. Demory-Luce D, Morales M, Nicklas T, Baranowski T, Zakeri I, Berenson G. Changes in food  
588 group consumption patterns from childhood to young adulthood: The Bogalusa Heart Study. J  
589 Am Diet Assoc. 2004 Nov 1;104(11):1684–91.
- 590 34. Weller BE, Bowen NK, Faubert SJ. Latent Class Analysis: A Guide to Best Practice. J Black  
591 Psychol. 2020 May 1;46(4):287–311.
- 592 35. Kaprio J. The Finnish Twin Cohort Study: an update. Twin Res Hum Genet. 2013  
593 Feb;16(1):157–62.
- 594 36. Rose RJ, Salvatore JE, Aaltonen S, Barr PB, Bogl LH, Byers HA, et al. FinnTwin12 Cohort: An  
595 Updated Review. Twin Res Hum Genet. 2019 Oct;22(5):302–11.
- 596 37. Kristenson H, Trell E. Indicators of alcohol consumption: comparisons between a questionnaire  
597 (Mm-MAST), interviews and serum gamma-glutamyl transferase (GGT) in a health survey of  
598 middle-aged males. Br J Addict. 1982 Sep;77(3):297–304.
- 599 38. Bogl LH, Pietiläinen KH, Rissanen A, Kangas AJ, Soininen P, Rose RJ, et al. Association  
600 between habitual dietary intake and lipoprotein subclass profile in healthy young adults. Nutr  
601 Metab Cardiovasc Dis. 2013 Nov 1;23(11):1071–8.
- 602 39. Min JL, Hemani G, Davey Smith G, Relton C, Suderman M. Meffil: efficient normalization and  
603 analysis of very large DNA methylation datasets. Bioinformatics. 2018 Dec 1;34(23):3983–9.

- 604 40. Sehovic E, Zellers SM, Youssef MK, Heikkinen A, Kaprio J, Ollikainen M. DNA methylation  
605 sites in early adulthood characterised by pubertal timing and development: a twin study. *Clin*  
606 *Epigenetics*. 2023 Nov 10;15(1):181.
- 607 41. Higgins-Chen AT, Thrush KL, Wang Y, Minter CJ, Kuo PL, Wang M, et al. A computational  
608 solution for bolstering reliability of epigenetic clocks: Implications for clinical trials and  
609 longitudinal tracking. *Nat Aging*. 2022 Jul;2(7):644–61.
- 610 42. Belsky DW, Caspi A, Arseneault L, Baccarelli A, Corcoran DL, Gao X, et al. Quantification of  
611 the pace of biological aging in humans through a blood test, the DunedinPoAm DNA  
612 methylation algorithm. Hagg S, Tyler JK, Hagg S, Justice J, Suderman M, editors. *eLife*. 2020  
613 May 5;9:e54870.
- 614 43. Baecke J, Burema J, Frijters J. A short questionnaire for the measurement of habitual physical  
615 activity in epidemiological studies. *Am J Clin Nutr*. 1982 Nov 1;36(5):936–42.
- 616 44. Mustelin L, Joutsu J, Latvala A, Pietiläinen KH, Rissanen A, Kaprio J. Genetic influences on  
617 physical activity in young adults: a twin study. *Med Sci Sports Exerc*. 2012 Jul;44(7):1293–301.
- 618 45. Bucholz KK, Cadoret R, Cloninger CR, Dinwiddie SH, Hesselbrock VM, Nurnberger JI, et al.  
619 A new, semi-structured psychiatric interview for use in genetic linkage studies: a report on the  
620 reliability of the SSAGA. *J Stud Alcohol*. 1994 Mar;55(2):149–58.
- 621 46. Clark SL, Muthén BO. Relating latent class analysis results to variables not included in the  
622 analysis [Internet]. 2009. Available from: <http://www.statmodel.com/download/relatinglca.pdf>
- 623 47. McAdams TA, Rijdsdijk FV, Zavos HMS, Pingault JB. Twins and Causal Inference: Leveraging  
624 Nature’s Experiment. *Cold Spring Harb Perspect Med*. 2021 Jun 1;11(6):a039552.
- 625 48. Muthén LK, Muthén BO. *Mplus User’s Guide*. Eighth Edition. Los Angeles, CA: Muthén &  
626 Muthén; 1998.

- 627 49. Yaskolka Meir A, Keller M, Hoffmann A, Rinott E, Tsaban G, Kaplan A, et al. The effect of  
628 polyphenols on DNA methylation-assessed biological age attenuation: the DIRECT PLUS  
629 randomized controlled trial. *BMC Med.* 2023 Sep 25;21(1):364.
- 630 50. Reynolds LM, Houston DK, Skiba MB, Whitsel EA, Stewart JD, Li Y, et al. Diet Quality and  
631 Epigenetic Aging in the Women’s Health Initiative. *J Acad Nutr Diet.* 2024 Jan 11;S2212-  
632 2672(24)00002-9.
- 633 51. Manach C, Scalbert A, Morand C, Rémésy C, Jiménez L. Polyphenols: food sources and  
634 bioavailability. *Am J Clin Nutr.* 2004 May 1;79(5):727–47.
- 635 52. Leri M, Scuto M, Ontario ML, Calabrese V, Calabrese EJ, Bucciantini M, et al. Healthy Effects  
636 of Plant Polyphenols: Molecular Mechanisms. *Int J Mol Sci.* 2020 Jan;21(4):1250.
- 637 53. Jiang S, Guo Y. Epigenetic Clock: DNA Methylation in Aging. *Stem Cells Int.* 2020 Jul  
638 8;2020:e1047896.
- 639 54. Dugué PA, Bassett JK, Joo JE, Baglietto L, Jung CH, Wong EM, et al. Association of DNA  
640 Methylation-Based Biological Age With Health Risk Factors and Overall and Cause-Specific  
641 Mortality. *Am J Epidemiol.* 2018 Mar 1;187(3):529–38.
- 642 55. Levine ME, Lu AT, Quach A, Chen BH, Assimes TL, Bandinelli S, et al. An epigenetic  
643 biomarker of aging for lifespan and healthspan. *Aging (Albany NY).* 2018 Apr 18;10(4):573–  
644 91.
- 645 56. Boada LD, Henríquez-Hernández LA, Luzardo OP. The impact of red and processed meat  
646 consumption on cancer and other health outcomes: Epidemiological evidences. *Food Chem*  
647 *Toxicol.* 2016 Jun 1;92:236–44.
- 648 57. Kouvari M, Tyrovolas S, Panagiotakos DB. Red meat consumption and healthy ageing: A  
649 review. *Maturitas.* 2016 Feb 1;84:17–24.

- 650 58. Ma J, Betts NM, Hampl JS. Clustering of Lifestyle Behaviors: The Relationship between  
651 Cigarette Smoking, Alcohol Consumption, and Dietary Intake. *Am J Health Promot.* 2000 Nov  
652 1;15(2):107–17.
- 653 59. Burke V, Milligan RA, Beilin LJ, Dunbar D, Spencer M, Balde E, et al. Clustering of health-  
654 related behaviors among 18-year-old Australians. *Prev Med.* 1997;26(5 Pt 1):724–33.
- 655 60. Pronk NP, Anderson LH, Crain AL, Martinson BC, O'Connor PJ, Sherwood NE, et al. Meeting  
656 recommendations for multiple healthy lifestyle factors. Prevalence, clustering, and predictors  
657 among adolescent, adult, and senior health plan members. *Am J Prev Med.* 2004 Aug;27(2  
658 Suppl):25–33.
- 659 61. Kankaanpää A, Tolvanen A, Heikkinen A, Kaprio J, Ollikainen M, Sillanpää E. The role of  
660 adolescent lifestyle habits in biological aging: A prospective twin study. Deelen J, Franco E,  
661 van Dongen J, Walton E, editors. *eLife.* 2022 Nov 8;11:e80729.
- 662 62. Pallister T, Sharafi M, Lachance G, Pirastu N, Mohny RP, MacGregor A, et al. Food  
663 Preference Patterns in a UK Twin Cohort. *Twin Res Hum Genet.* 2015 Dec;18(6):793–805.
- 664 63. Smith AD, Fildes A, Cooke L, Herle M, Shakeshaft N, Plomin R, et al. Genetic and  
665 environmental influences on food preferences in adolescence. *Am J Clin Nutr.* 2016 Aug  
666 1;104(2):446–53.
- 667 64. Mompeo O, Gibson R, Christofidou P, Spector TD, Menni C, Mangino M. Genetic and  
668 Environmental Influences of Dietary Indices in a UK Female Twin Cohort. *Twin Res Hum  
669 Genet.* 2020 Dec;23(6):330–7.

670 **Figure legends**

671 Fig. 1. Mean consumption of selected food items by dietary patterns derived from latent class  
672 analysis. The mean values are presented on a Z-score scale.

673

674 Fig. 2. Differences between the dietary patterns in A) principal component-based GrimAge  
675 acceleration and B) the pace of aging (measured by the DunedinPACE estimator): individual-level  
676 analysis.

677 Model 1 was adjusted for family relatedness, total nonalcoholic energy intake, and sex; Model 2

678 was adjusted for the covariates in Model 1 plus smoking status and daily alcohol intake; and Model

679 3 was adjusted for the covariates in Model 2 plus BMI and the Baecke sport index.

680 F&V, fruits and vegetables; B, standardized regression coefficient; CI, confidence interval; Ref.,

681 reference group.

682

683 Fig. 3. Differences in principal component-based GrimAge acceleration at different BMI levels  
684 between dietary patterns in comparison to the High fast food, low fruits and vegetables (A–E). The  
685 estimated means were obtained from the linear regression model, and the gray areas depict the 95%  
686 confidence intervals.

687 AAPC-Grim, principal component-based GrimAge acceleration; BMI, body mass index.

688

689 Fig. 4. Differences in principal component-based GrimAge acceleration between dietary patterns in  
690 A) all pairs, B) monozygotic twin pairs, and C) dizygotic twin pairs: within-pair analysis.

691 Model 1 was adjusted for family relatedness, total nonalcoholic energy intake, and sex; Model 2

692 was adjusted for the covariates in Model 1 plus smoking status and daily alcohol intake; and Model

693 3 was adjusted for the covariates in Model 2 plus BMI and the Baecke sport index.

694 F&V, fruits and vegetables; B, standardized regression coefficient; CI, confidence interval; Ref.,  
695 reference group.

696

697 Fig. 5. Differences in the pace of aging (measured by the DunedinPACE estimator) between dietary  
698 patterns in A) all pairs, B) monozygotic twin pairs, and C) dizygotic twin pairs: within-pair  
699 analysis.

700 Model 1 was adjusted for family relatedness, total nonalcoholic energy intake, and sex; Model 2  
701 was adjusted for the covariates in Model 1 plus smoking status and daily alcohol intake; and Model  
702 3 was adjusted for the covariates in Model 2 plus BMI and the Baecke sport index.

703 F&V, fruits and vegetables; B, standardized regression coefficient; CI, confidence interval; Ref.,  
704 reference group.

705

706 Fig. S1. Probabilities of consumption for food items treated as binary variables by dietary patterns  
707 derived from latent class analysis.

708

709 Fig. S2. Differences in principal component-based GrimAge acceleration between dietary patterns  
710 among A) males and B) females: individual-level analysis.

711 Model 1 was adjusted for family relatedness, total nonalcoholic energy intake, and sex; Model 2  
712 was adjusted for the covariates in Model 1 plus smoking status and daily alcohol intake; and Model  
713 3 was adjusted for the covariates in Model 2 plus BMI and the Baecke sport index.

714 F&V, fruits and vegetables; B, standardized regression coefficient; CI, confidence interval; Ref.,  
715 reference group.

716

717 Fig. S3. Differences in the pace of aging (measured by the DunedinPACE estimator) between  
718 dietary patterns among A) males and B) females: individual-level analysis.

719 Model 1 was adjusted for family relatedness, total nonalcoholic energy intake, and sex; Model 2  
720 was adjusted for the covariates in Model 1 plus smoking status and daily alcohol intake; and Model  
721 3 was adjusted for the covariates in Model 2 plus BMI and the Baecke sport index.  
722 F&V, fruits and vegetables; B, standardized regression coefficient; CI, confidence interval; Ref.,  
723 reference group.  
724  
725 Fig. S4. Differences in principal component-based GrimAge acceleration at different BMI levels  
726 between dietary patterns in comparison to the High fast food, low fruits and vegetables pattern (A–  
727 E). The estimated means were obtained from the regression model with quadratic terms of BMI,  
728 and the gray areas depict the 95% confidence intervals.  
729 AAPC-Grim, principal component-based GrimAge acceleration; BMI, body mass index.



- 1: High fast food, low fruits and vegetables
- 2: Plant-based
- ▲ 3: Health-conscious
- ◆ 4: Western with infrequent fish
- ⊠ 5: Western with regular fish
- ⊕ 6: Balanced average

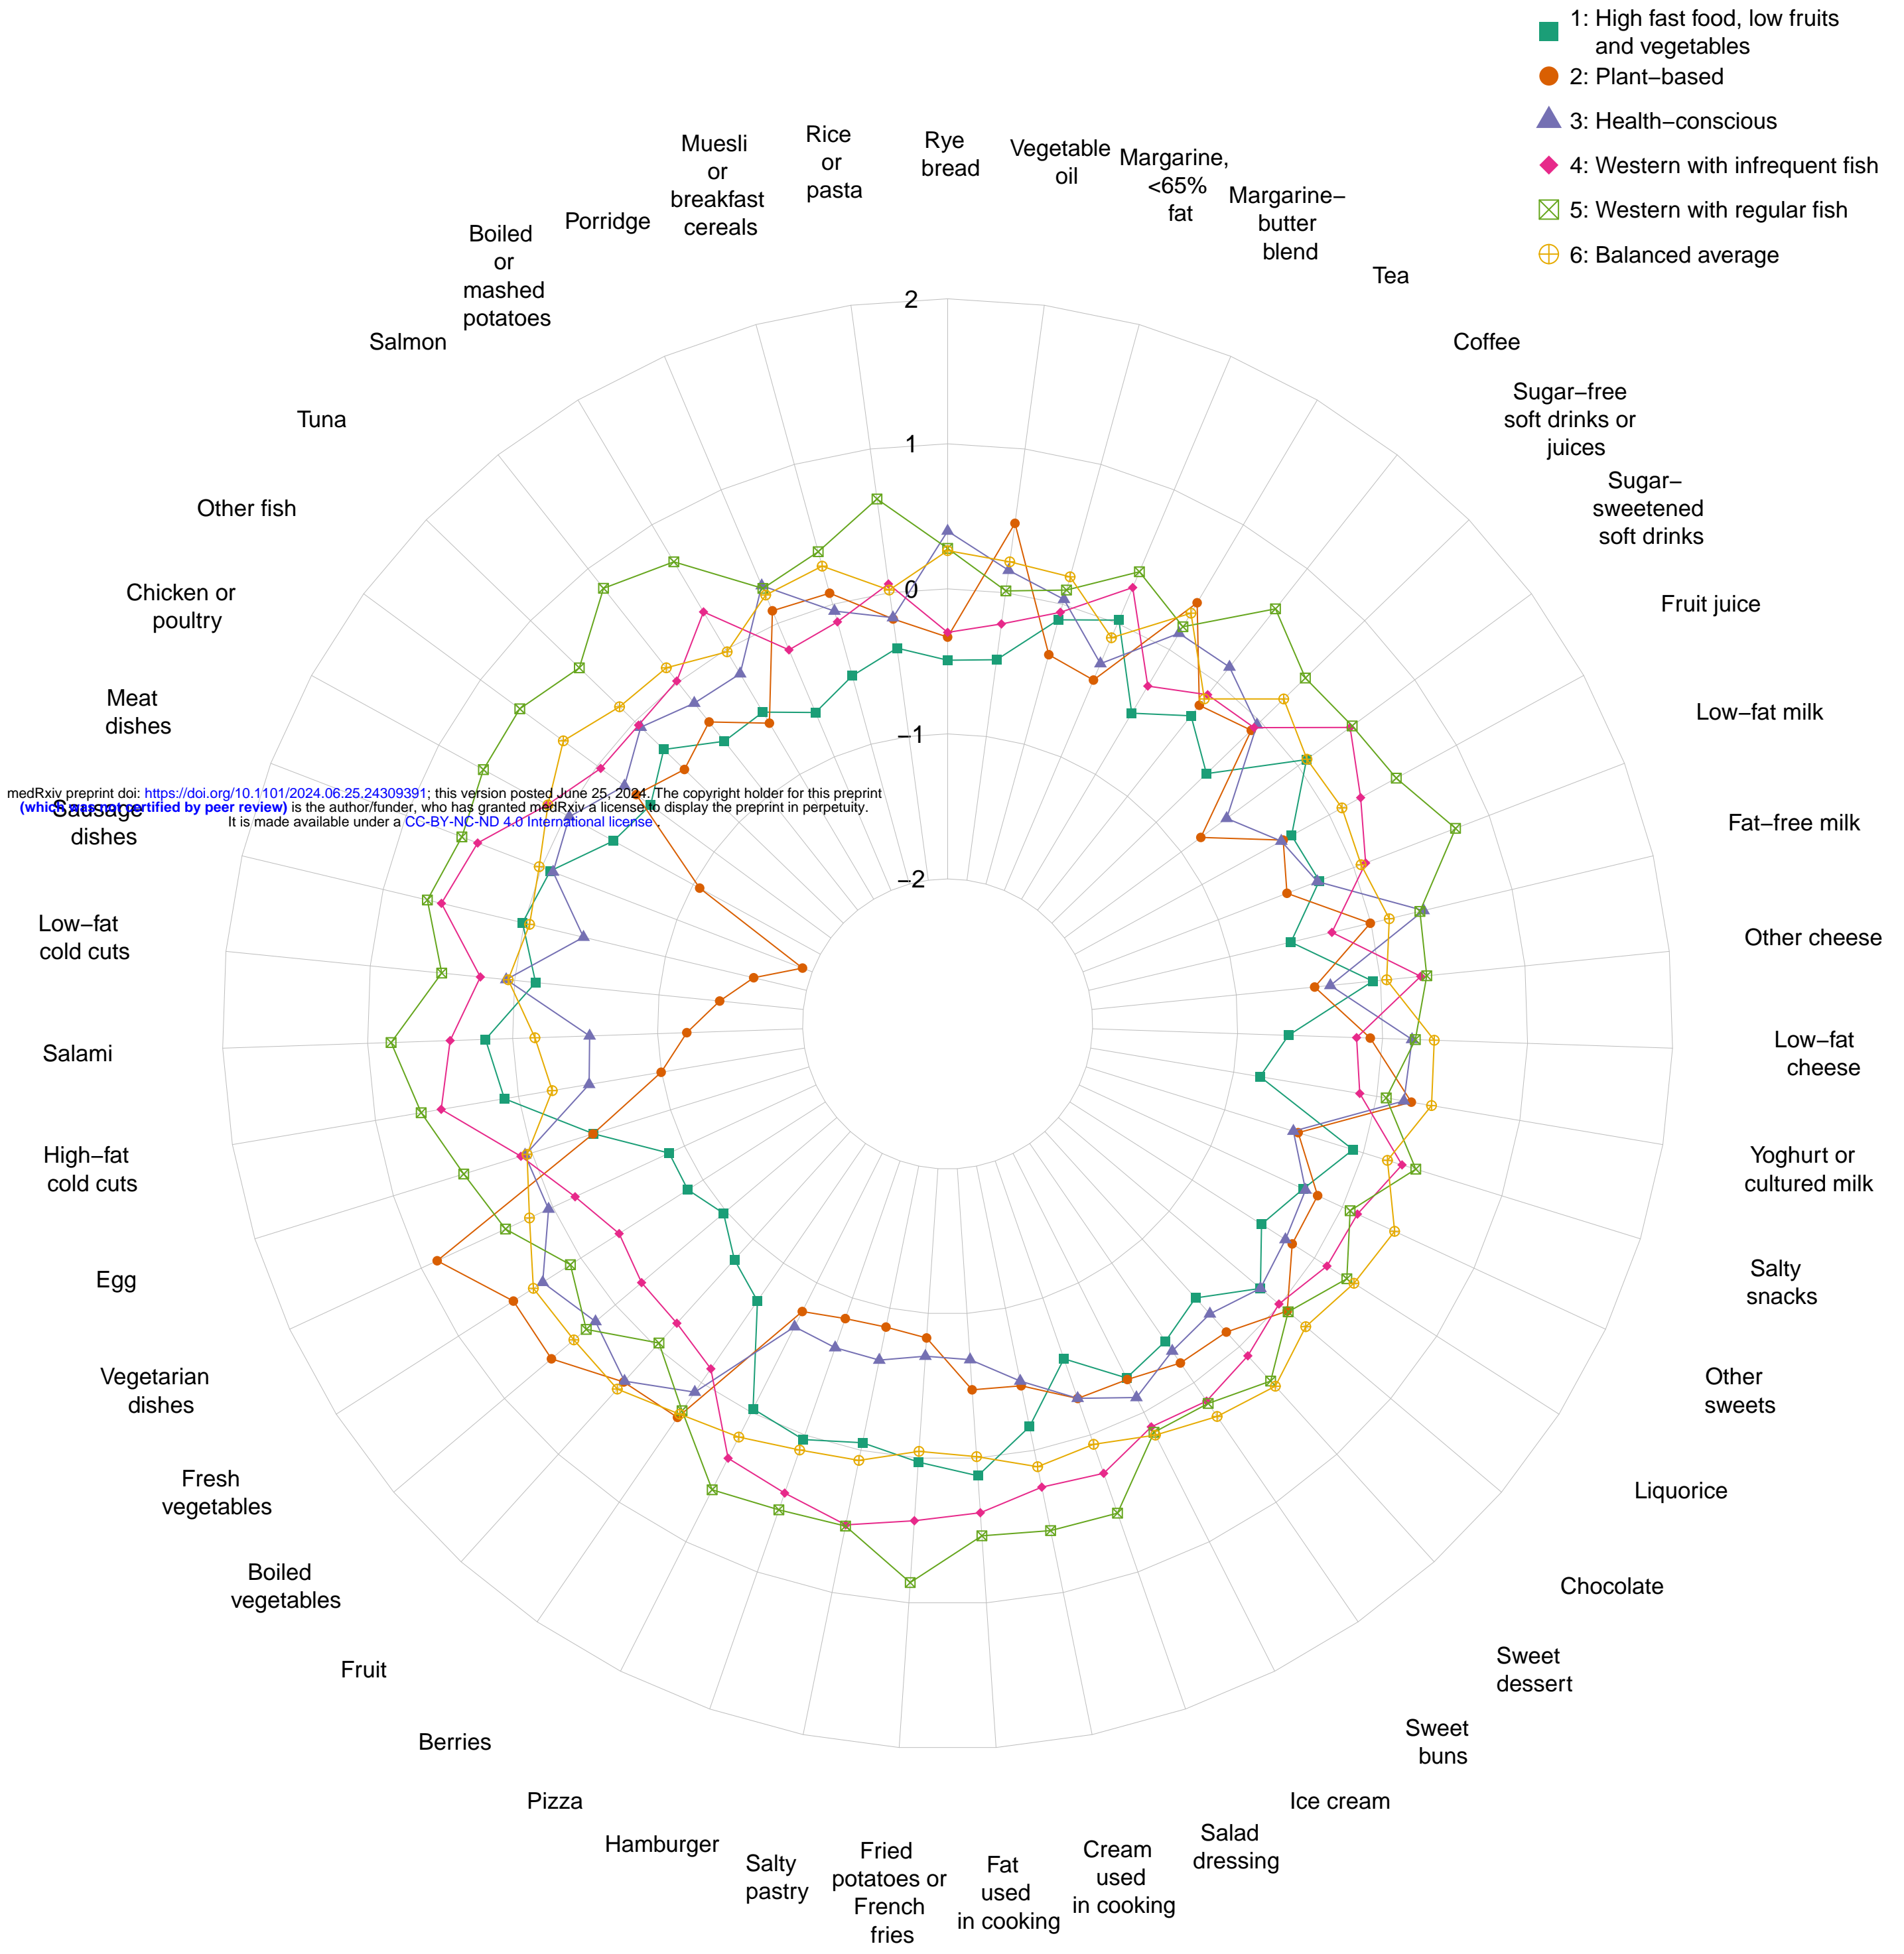

medRxiv preprint doi: <https://doi.org/10.1101/2024.06.25.24309391>; this version posted June 25, 2024. The copyright holder for this preprint (which was not certified by peer review) is the author/funder, who has granted medRxiv a license to display the preprint in perpetuity. It is made available under a [CC-BY-NC-ND 4.0 International license](https://creativecommons.org/licenses/by-nc-nd/4.0/).

## A) PC-GrimAge acceleration (n=826)

medRxiv preprint doi: <https://doi.org/10.1101/2024.06.25.24309391>; this version posted June 25, 2024. The copyright holder for this preprint (which was not certified by peer review) is the author/funder, who has granted medRxiv a license to display the preprint in perpetuity. It is made available under a [CC-BY-NC-ND 4.0 International license](https://creativecommons.org/licenses/by-nc-nd/4.0/).

### Model 1

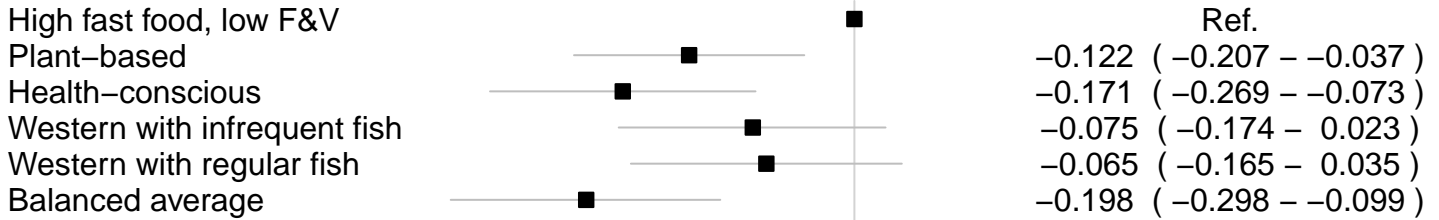

### Model 2

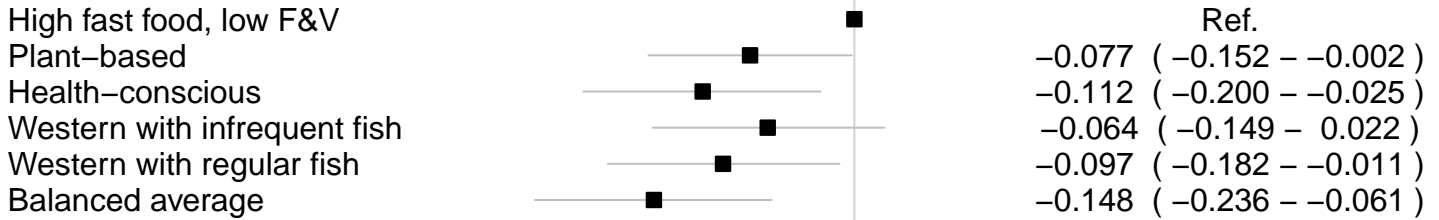

### Model 3

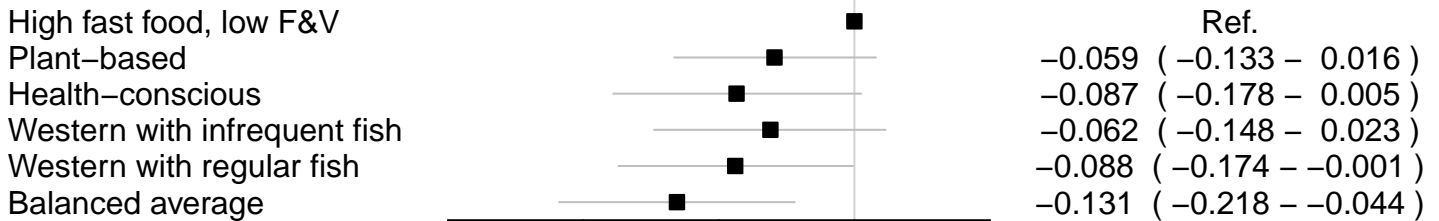

-0.3 -0.2 -0.1 0 0.1  
B (95% CI)

## B) Pace of aging (n=826)

### Model 1

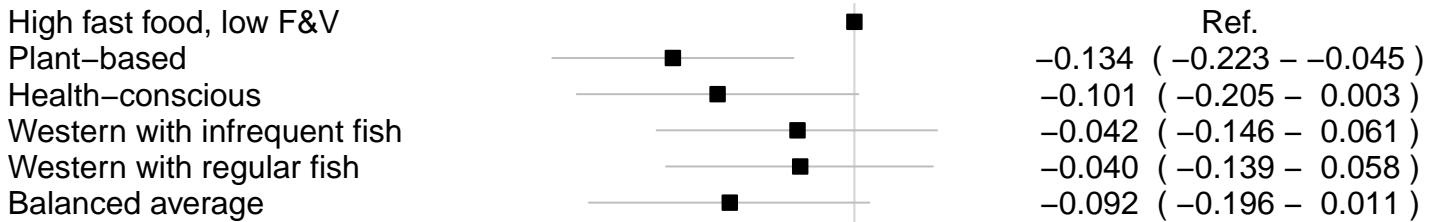

### Model 2

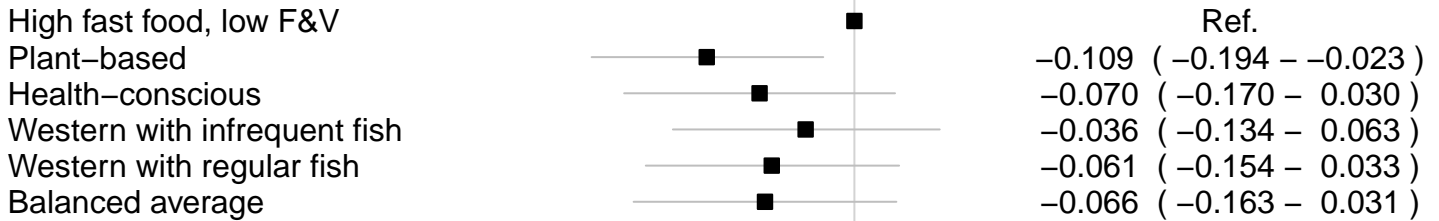

### Model 3

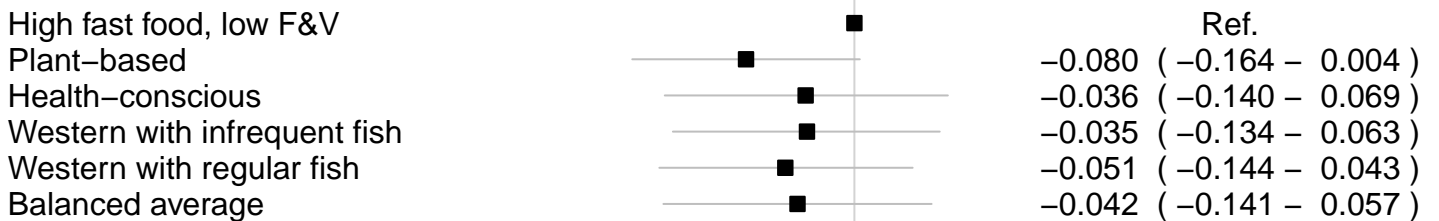

-0.3 -0.2 -0.1 0 0.1  
B (95% CI)

A)

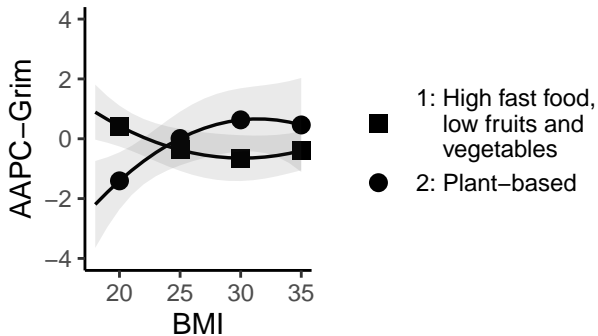

B)

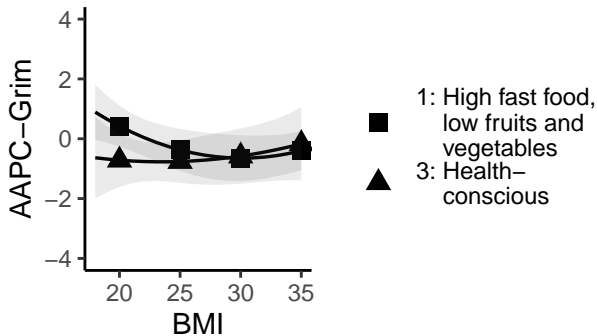

C)

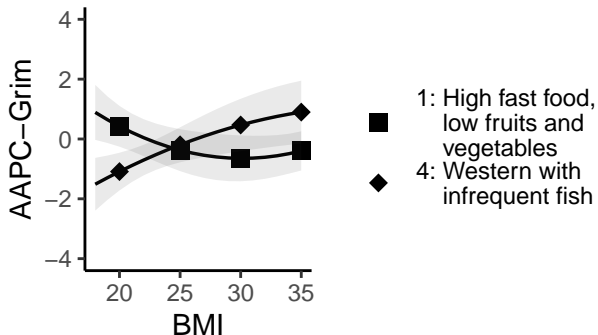

D)

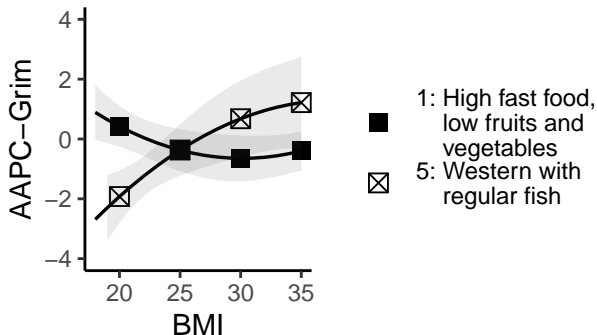

E)

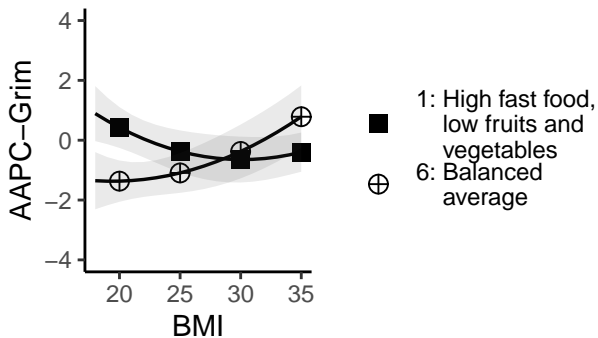

**A) All twin pairs (n=363 pairs)**

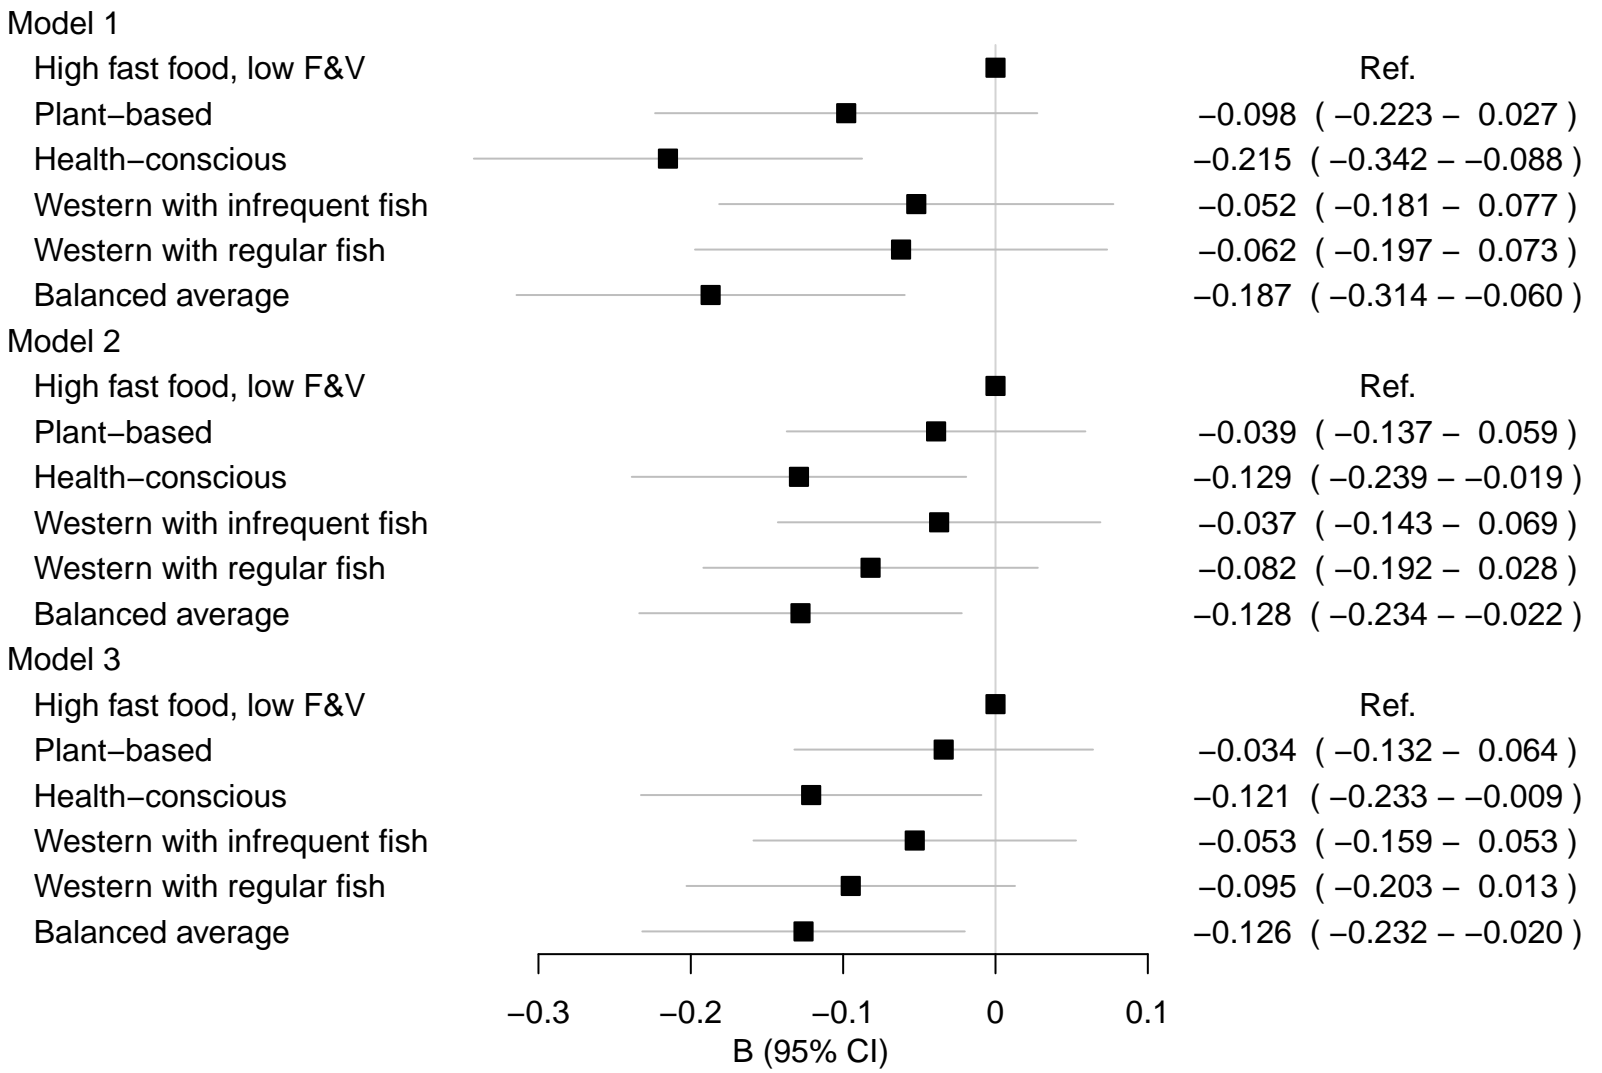

**B) Monozygotic twin pairs (n=157 pairs)**

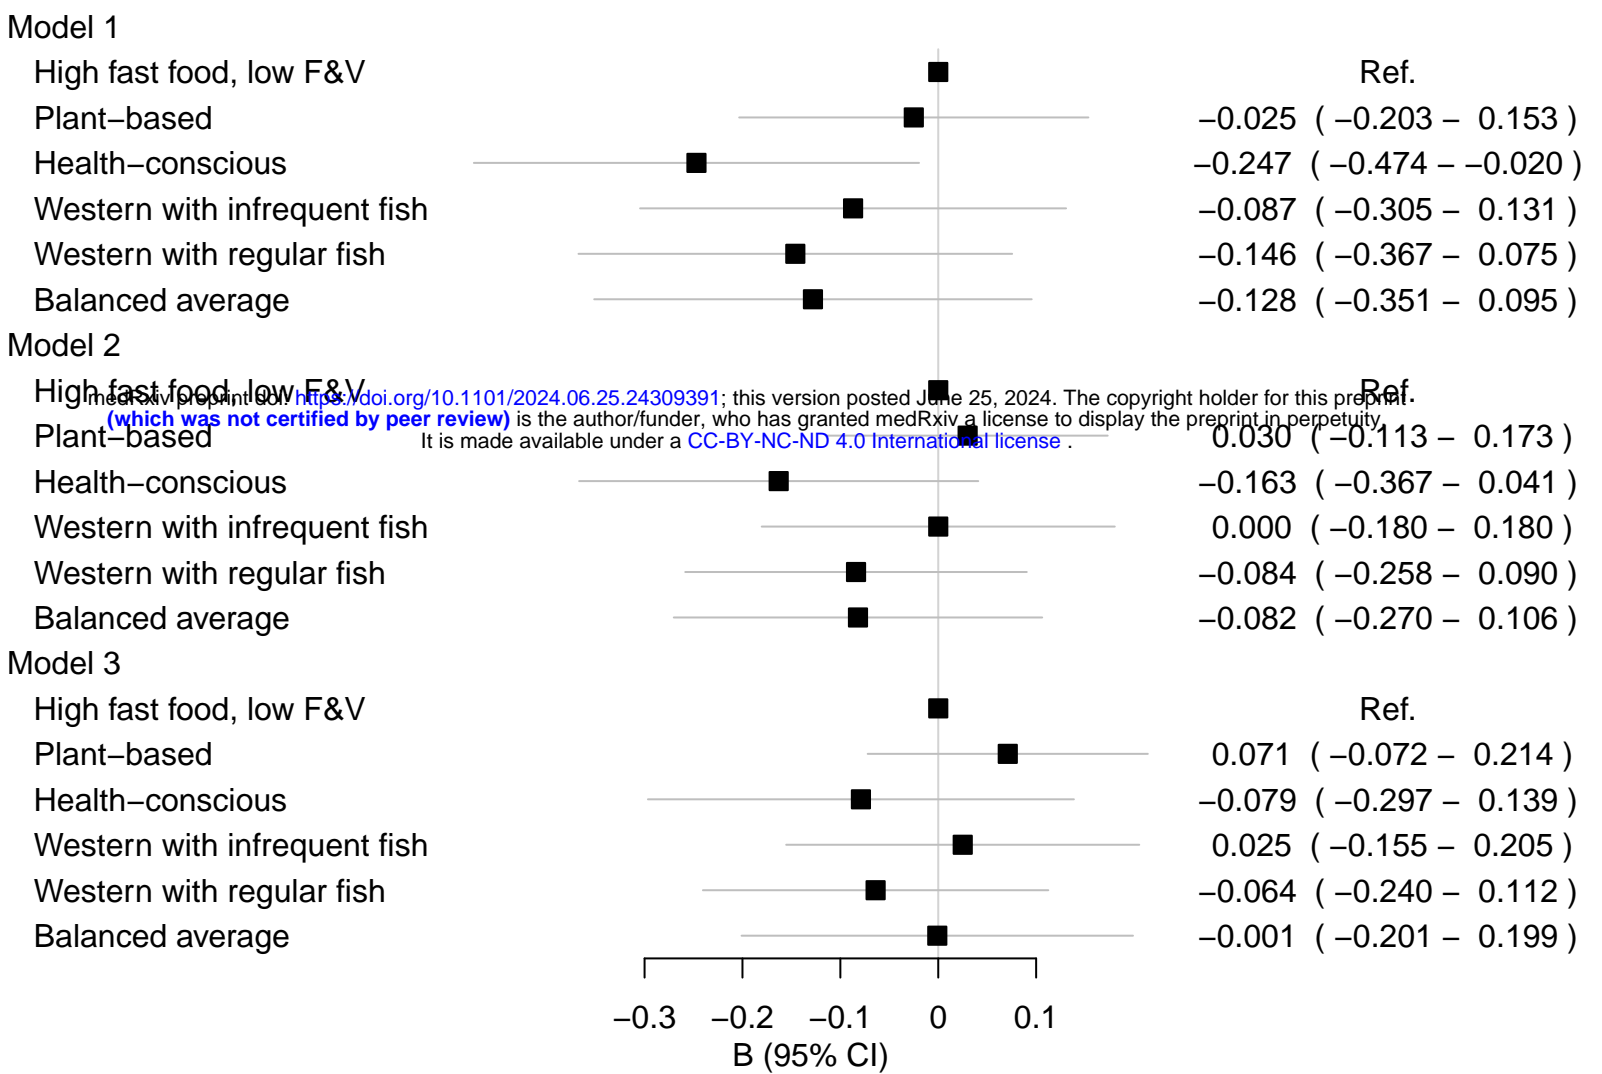

**C) Dizygotic twin pairs (n=206 pairs)**

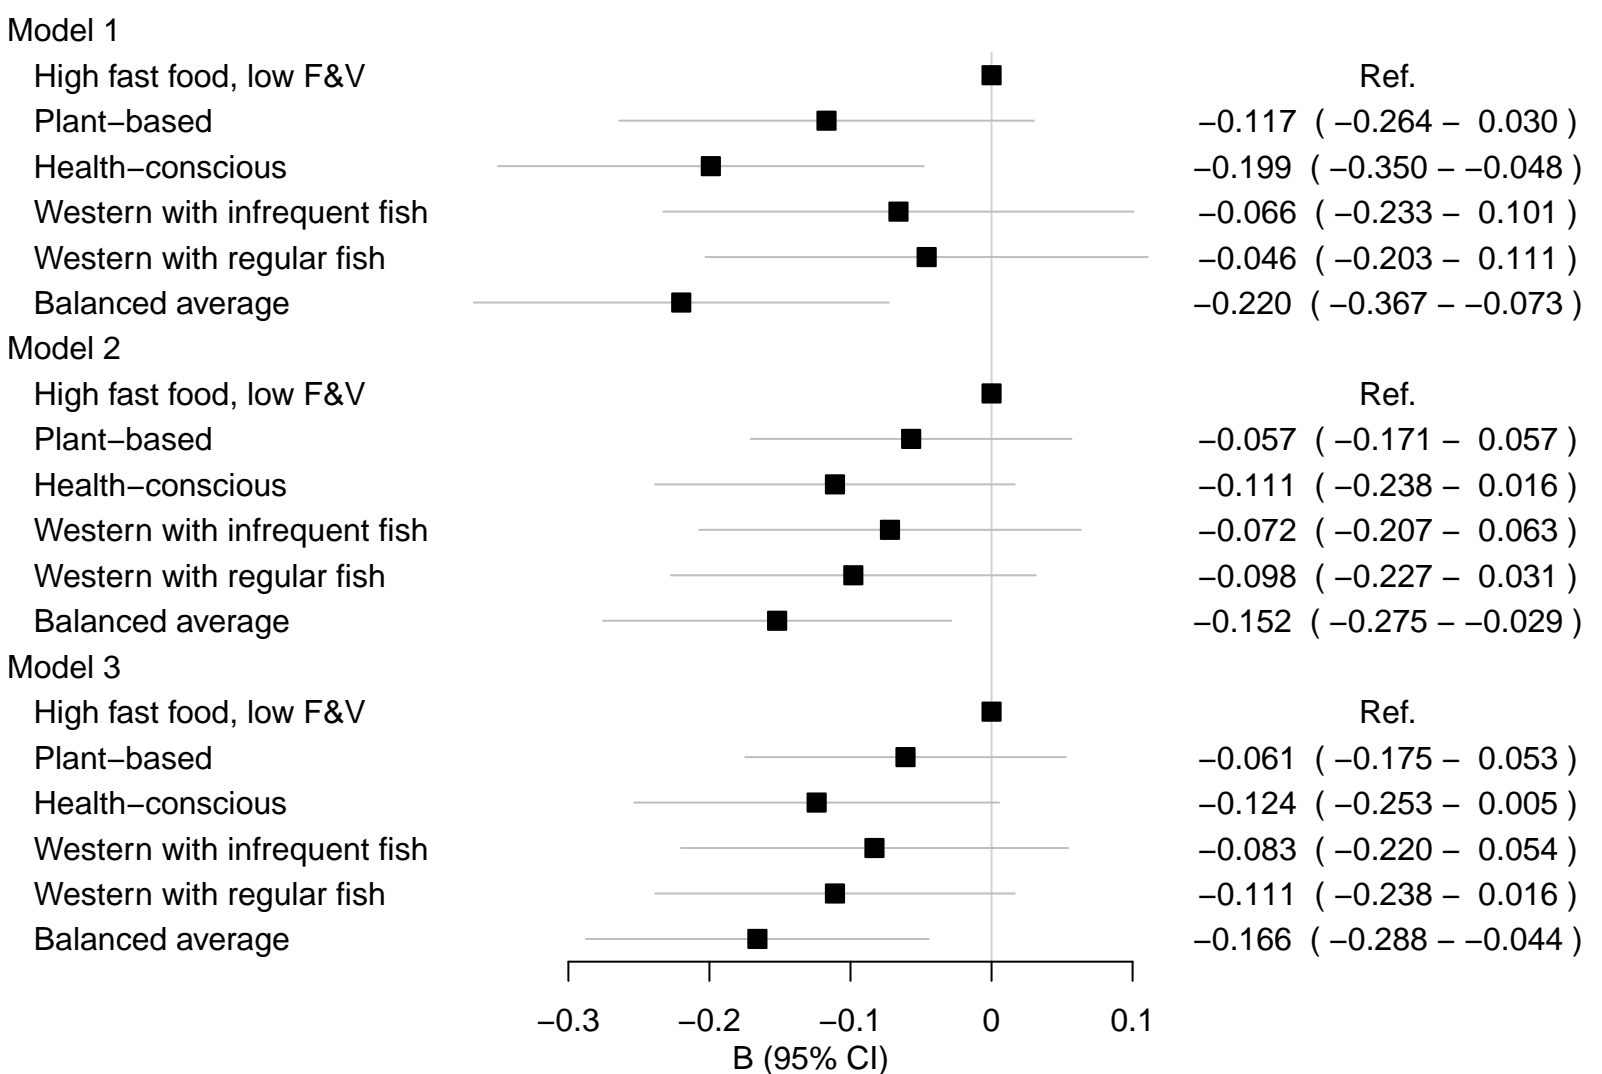

**A) All twin pairs (n=363 pairs)**

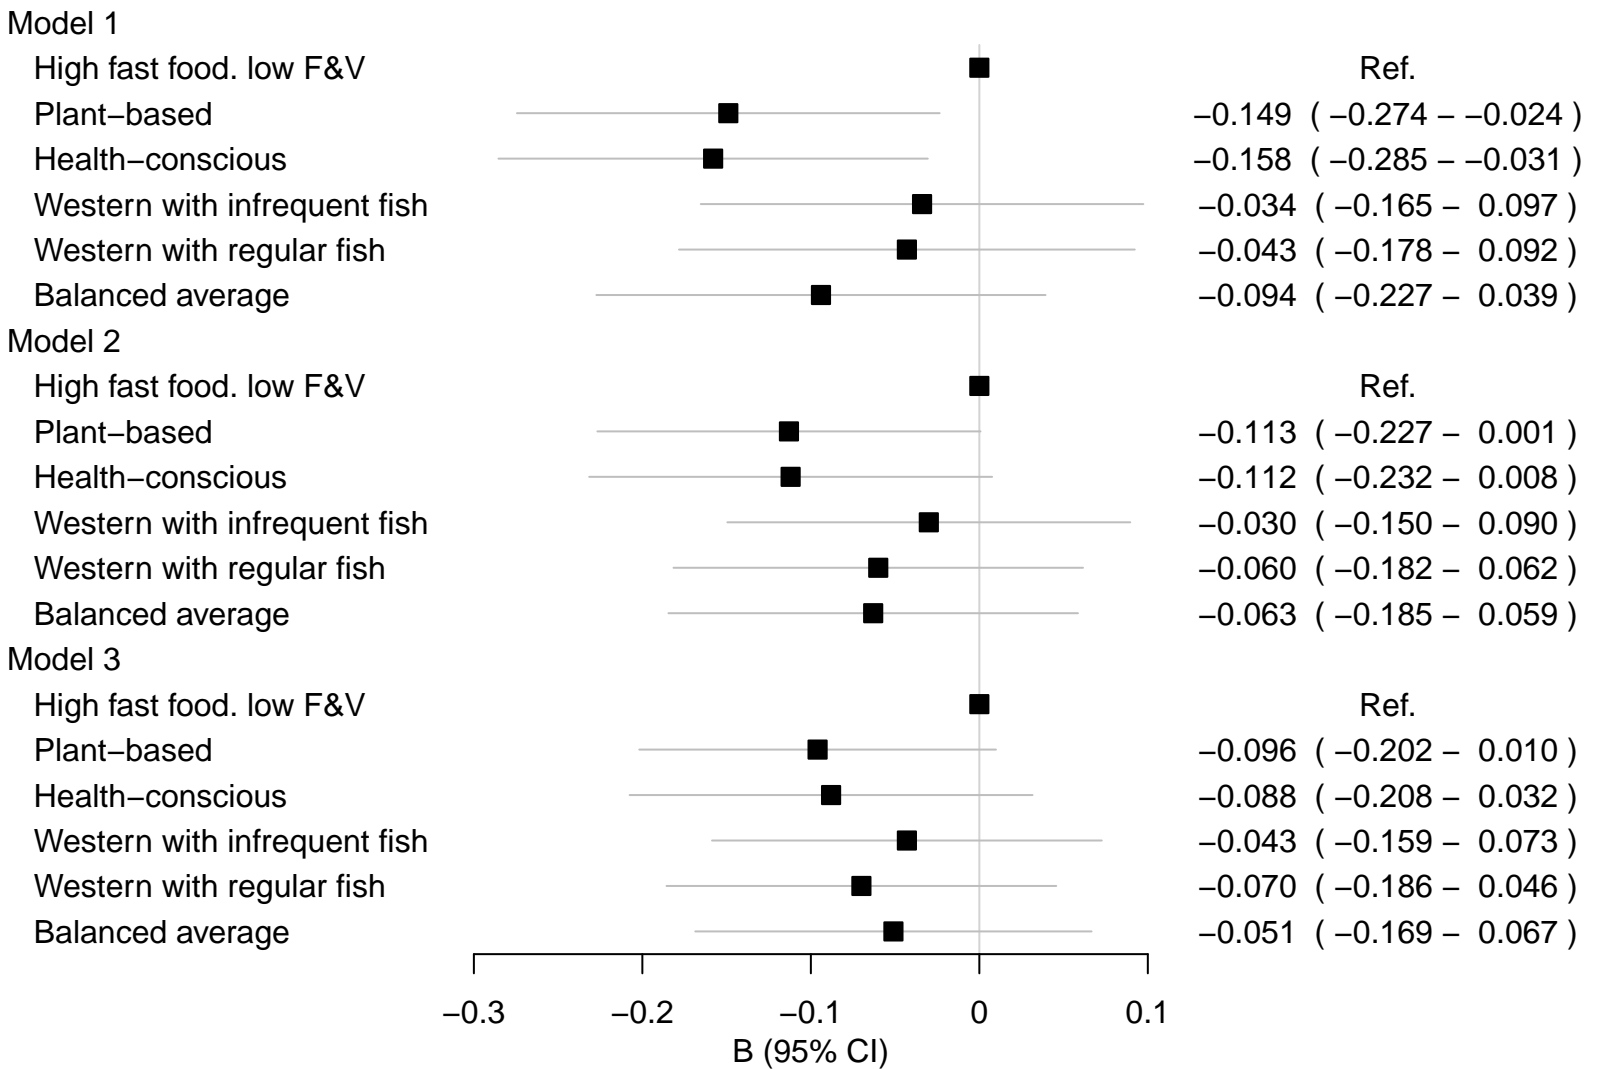

**B) Monozygotic twin pairs (n=157 pairs)**

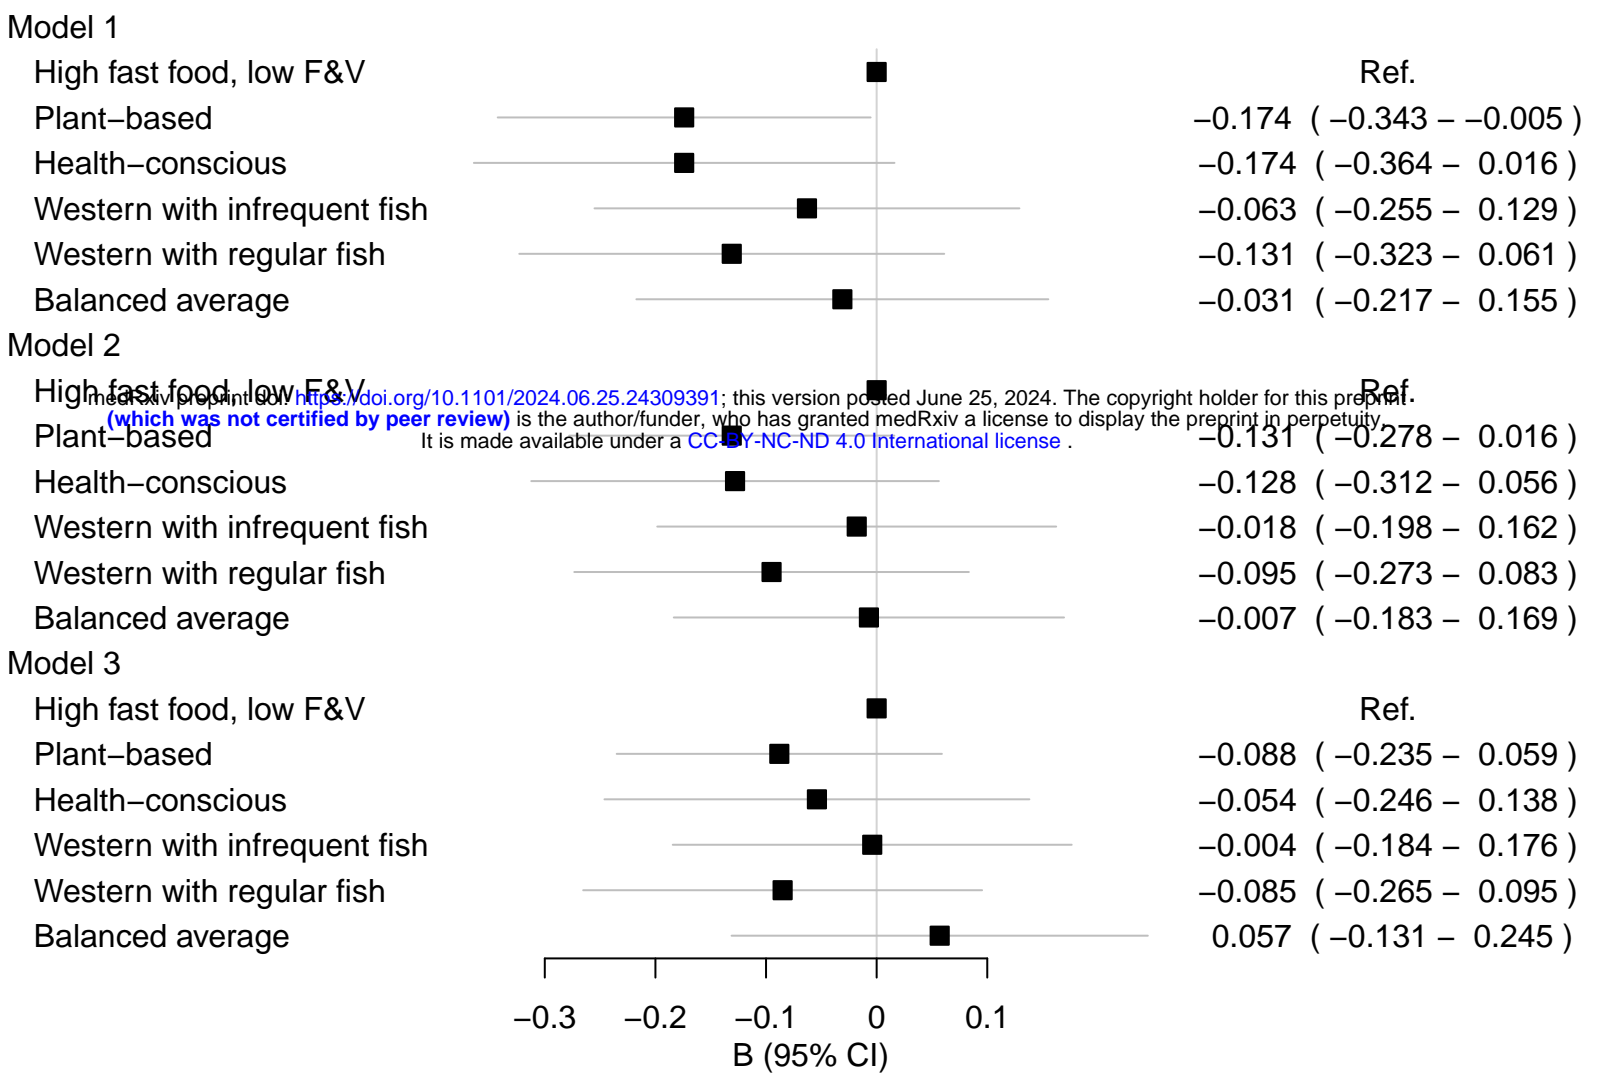

**C) Dizygotic twin pairs (n=206 pairs)**

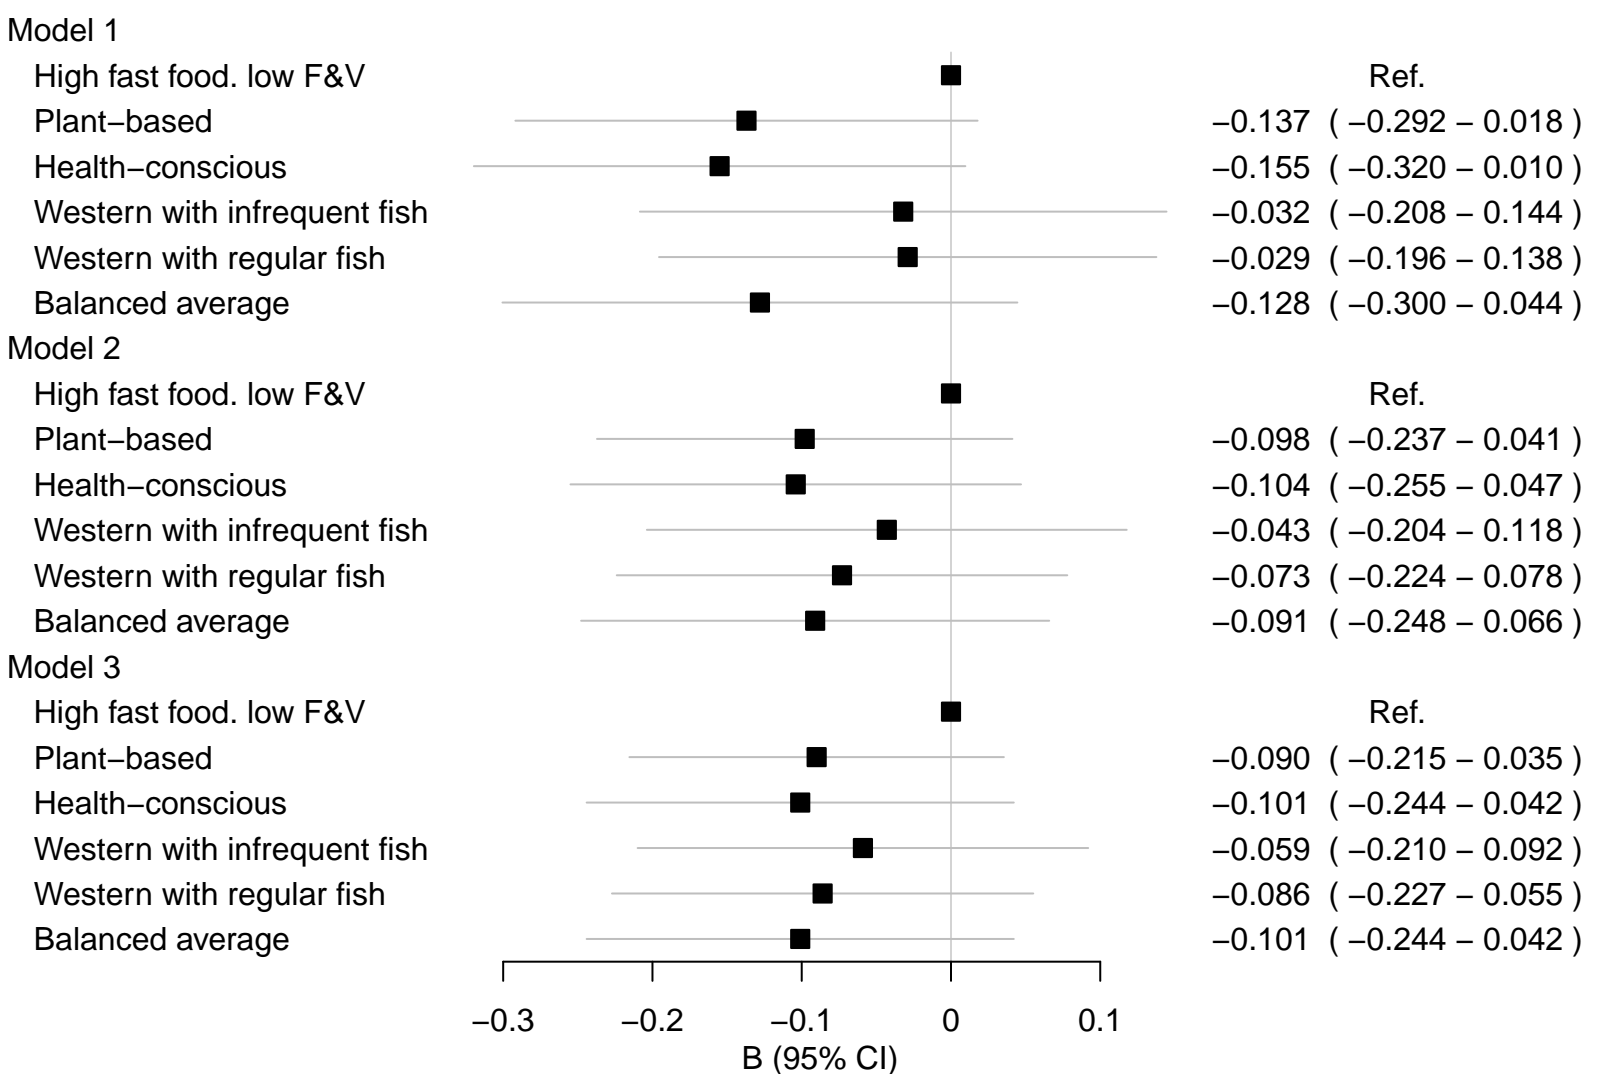

Source: https://medrxiv.org/content/10.1101/2024.06.25.24309391.full.pdf
